# Supplementary material
Source: MDPI journal article supplement (https://www.mdpi.com/2071-1050/13/13/7431)
Supplement: s1 [file s1]

Table S1: Results of Tukey's post hoc tests analyses with IRI subscales as outcome variables, and country.

|                    |          |                      | Mean                |            |         | 95% Confidence Interval |             |
|--------------------|----------|----------------------|---------------------|------------|---------|-------------------------|-------------|
| Dependent Variable |          |                      | Difference (I-J)    | Std. Error | Sig.    | Lower Bound             | Upper Bound |
| Perspective-Taking | ARMENIA  | BELARUS              | 1,4592              | 0,84016    | 0,987   | -1,5791                 | 4,4975      |
|                    |          | BRAZIL               | -1,2000             | 0,79324    | 0,998   | -4,0686                 | 1,6686      |
|                    |          | BULGARIA             | 0,2680              | 0,80728    | 1,000   | -2,6514                 | 3,1874      |
|                    |          | CANADA               | 1,3483              | 0,78964    | 0,989   | -1,5073                 | 4,2039      |
|                    |          | CROATIA              | -0,9297             | 0,81367    | 1,000   | -3,8722                 | 2,0128      |
|                    |          | HUNGARY              | -0,3029             | 0,82149    | 1,000   | -3,2737                 | 2,6679      |
|                    |          | INDIA                | 1,6690              | 0,80129    | 0,910   | -1,2287                 | 4,5668      |
|                    |          | INDONESIA            | 0,5623              | 0,78240    | 1,000   | -2,2671                 | 3,3918      |
|                    |          | IRAN                 | 1,9597              | 0,80937    | 0,715   | -0,9673                 | 4,8866      |
|                    |          | IRAQ                 | 3,1890 <sup>*</sup> | 0,83898    | 0,026   | 0,1550                  | 6,2230      |
|                    |          | ITALY                | -1,0577             | 0,81764    | 1,000   | -4,0146                 | 1,8991      |
|                    |          | JORDAN               | 3,7088 <sup>*</sup> | 0,79660    | 0,001   | 0,8280                  | 6,5896      |
|                    |          | MALAYSIA             | 5,4660 <sup>*</sup> | 0,78043    | 0,000   | 2,6437                  | 8,2883      |
|                    |          | NIGERIA              | 1,1075              | 0,90441    | 1,000   | -2,1632                 | 4,3781      |
|                    |          | PAKISTAN             | 2,9001 <sup>*</sup> | 0,79463    | 0,045   | 0,0265                  | 5,7738      |
|                    |          | ROMANIA              | -0,3588             | 0,81481    | 1,000   | -3,3054                 | 2,5879      |
|                    |          | RUSSIA               | 1,5986              | 0,77582    | 0,918   | -1,2070                 | 4,4043      |
|                    |          | SAUDI ARABIA         | 2,5672              | 0,79890    | 0,166   | -0,3219                 | 5,4563      |
|                    |          | TANZANIA             | 3,5934 <sup>*</sup> | 0,80519    | 0,002   | 0,6815                  | 6,5052      |
|                    |          | TURKEY               | 0,8563              | 0,77154    | 1,000   | -1,9338                 | 3,6465      |
|                    |          | THAILAND             | 2,2790              | 0,81017    | 0,407   | -0,6508                 | 5,2088      |
|                    |          | USA                  | -1,6199             | 0,78851    | 0,920   | -4,4714                 | 1,2316      |
| BELARUS            | ARMENIA  | -1,4592              | 0,84016             | 0,987      | -4,4975 | 1,5791                  |             |
|                    | BRAZIL   | -2,6592 <sup>*</sup> | 0,39096             | 0,000      | -4,0730 | -1,2453                 |             |
|                    | BULGARIA | -1,1912              | 0,41872             | 0,384      | -2,7054 | 0,3231                  |             |
|                    | CANADA   | -0,1108              | 0,38360             | 1,000      | -1,4981 | 1,2764                  |             |
|                    | CROATIA  | -2,3889 <sup>*</sup> | 0,43091             | 0,000      | -3,9472 | -0,8306                 |             |
|                    | HUNGARY  | -1,7621 <sup>*</sup> | 0,44550             | 0,015      | -3,3732 | -0,1510                 |             |
|                    | INDIA    | 0,2099               | 0,40704             | 1,000      | -1,2621 | 1,6819                  |             |

|        |              |           |         |       |         |         |
|--------|--------------|-----------|---------|-------|---------|---------|
|        | INDONESIA    | -0,8968   | 0,36847 | 0,705 | -2,2293 | 0,4357  |
|        | IRAN         | 0,5005    | 0,42274 | 1,000 | -1,0283 | 2,0292  |
|        | IRAQ         | 1,7298 *  | 0,47698 | 0,048 | 0,0049  | 3,4547  |
|        | ITALY        | -2,5169 * | 0,43836 | 0,000 | -4,1022 | -0,9316 |
|        | JORDAN       | 2,2496 *  | 0,39774 | 0,000 | 0,8113  | 3,6879  |
|        | MALAYSIA     | 4,0069 *  | 0,36427 | 0,000 | 2,6895  | 5,3242  |
|        | NIGERIA      | -0,3517   | 0,58445 | 1,000 | -2,4653 | 1,7618  |
|        | PAKISTAN     | 1,4410 *  | 0,39377 | 0,043 | 0,0170  | 2,8650  |
|        | ROMANIA      | -1,8180 * | 0,43305 | 0,006 | -3,3840 | -0,2519 |
|        | RUSSIA       | 0,1395    | 0,35429 | 1,000 | -1,1418 | 1,4207  |
|        | SAUDI ARABIA | 1,1080    | 0,40233 | 0,453 | -0,3469 | 2,5630  |
|        | TANZANIA     | 2,1342 *  | 0,41467 | 0,000 | 0,6346  | 3,6338  |
|        | TURKEY       | -0,6029   | 0,34481 | 0,986 | -1,8498 | 0,6441  |
|        | THAILAND     | 0,8198    | 0,42425 | 0,956 | -0,7144 | 2,3541  |
|        | USA          | -3,0791 * | 0,38128 | 0,000 | -4,4579 | -1,7003 |
| BRAZIL | ARMENIA      | 1,2000    | 0,79324 | 0,998 | -1,6686 | 4,0686  |
|        | BELARUS      | 2,6592 *  | 0,39096 | 0,000 | 1,2453  | 4,0730  |
|        | BULGARIA     | 1,4680 *  | 0,31414 | 0,001 | 0,3320  | 2,6040  |
|        | CANADA       | 2,5483 *  | 0,26553 | 0,000 | 1,5881  | 3,5086  |
|        | CROATIA      | 0,2703    | 0,33020 | 1,000 | -0,9238 | 1,4644  |
|        | HUNGARY      | 0,8971    | 0,34903 | 0,599 | -0,3651 | 2,1593  |
|        | INDIA        | 2,8690 *  | 0,29838 | 0,000 | 1,7900  | 3,9481  |
|        | INDONESIA    | 1,7623 *  | 0,24315 | 0,000 | 0,8830  | 2,6416  |
|        | IRAN         | 3,1597 *  | 0,31947 | 0,000 | 2,0044  | 4,3149  |
|        | IRAQ         | 4,3890 *  | 0,38840 | 0,000 | 2,9844  | 5,7936  |
|        | ITALY        | 0,1423    | 0,33987 | 1,000 | -1,0868 | 1,3713  |
|        | JORDAN       | 4,9088 *  | 0,28556 | 0,000 | 3,8761  | 5,9415  |
|        | MALAYSIA     | 6,6660 *  | 0,23674 | 0,000 | 5,8099  | 7,5222  |
|        | NIGERIA      | 2,3075 *  | 0,51471 | 0,002 | 0,4461  | 4,1688  |
|        | PAKISTAN     | 4,1001 *  | 0,28001 | 0,000 | 3,0875  | 5,1127  |
|        | ROMANIA      | 0,8412    | 0,33300 | 0,634 | -0,3630 | 2,0454  |
|        | RUSSIA       | 2,7986 *  | 0,22107 | 0,000 | 1,9992  | 3,5981  |

|          |              |           |         |       |         |         |
|----------|--------------|-----------|---------|-------|---------|---------|
|          | SAUDI ARABIA | 3,7672 *  | 0,29192 | 0,000 | 2,7115  | 4,8229  |
|          | TANZANIA     | 4,7933 *  | 0,30872 | 0,000 | 3,6769  | 5,9098  |
|          | TURKEY       | 2,0563 *  | 0,20554 | 0,000 | 1,3130  | 2,7996  |
|          | THAILAND     | 3,4790 *  | 0,32147 | 0,000 | 2,3165  | 4,6415  |
|          | USA          | -0,4199   | 0,26215 | 0,995 | -1,3679 | 0,5281  |
| BULGARIA | ARMENIA      | -0,2680   | 0,80728 | 1,000 | -3,1874 | 2,6514  |
|          | BELARUS      | 1,1912    | 0,41872 | 0,384 | -0,3231 | 2,7054  |
|          | BRAZIL       | -1,4680 * | 0,31414 | 0,001 | -2,6040 | -0,3320 |
|          | CANADA       | 1,0803    | 0,30494 | 0,064 | -0,0224 | 2,1831  |
|          | CROATIA      | -1,1977   | 0,36265 | 0,130 | -2,5092 | 0,1138  |
|          | HUNGARY      | -0,5709   | 0,37987 | 0,998 | -1,9447 | 0,8028  |
|          | INDIA        | 1,4010 *  | 0,33394 | 0,006 | 0,1934  | 2,6086  |
|          | INDONESIA    | 0,2943    | 0,28566 | 1,000 | -0,7387 | 1,3274  |
|          | IRAN         | 1,6916 *  | 0,35290 | 0,000 | 0,4154  | 2,9679  |
|          | IRAQ         | 2,9210 *  | 0,41634 | 0,000 | 1,4153  | 4,4266  |
|          | ITALY        | -1,3257   | 0,37147 | 0,058 | -2,6691 | 0,0176  |
|          | JORDAN       | 3,4408 *  | 0,32253 | 0,000 | 2,2744  | 4,6071  |
|          | MALAYSIA     | 5,1980 *  | 0,28023 | 0,000 | 4,1846  | 6,2114  |
|          | NIGERIA      | 0,8394    | 0,53611 | 0,997 | -1,0993 | 2,7782  |
|          | PAKISTAN     | 2,6321 *  | 0,31762 | 0,000 | 1,4835  | 3,7808  |
|          | ROMANIA      | -0,6268   | 0,36520 | 0,989 | -1,9475 | 0,6939  |
|          | RUSSIA       | 1,3306 *  | 0,26712 | 0,000 | 0,3646  | 2,2966  |
|          | SAUDI ARABIA | 2,2992 *  | 0,32818 | 0,000 | 1,1124  | 3,4860  |
|          | TANZANIA     | 3,3253 *  | 0,34320 | 0,000 | 2,0842  | 4,5665  |
|          | TURKEY       | 0,5883    | 0,25442 | 0,790 | -0,3318 | 1,5084  |
|          | THAILAND     | 2,0110 *  | 0,35472 | 0,000 | 0,7282  | 3,2938  |
|          | USA          | -1,8879 * | 0,30200 | 0,000 | -2,9801 | -0,7958 |
| CANADA   | ARMENIA      | -1,3483   | 0,78964 | 0,989 | -4,2039 | 1,5073  |
|          | BELARUS      | 0,1108    | 0,38360 | 1,000 | -1,2764 | 1,4981  |
|          | BRAZIL       | -2,5483 * | 0,26553 | 0,000 | -3,5086 | -1,5881 |
|          | BULGARIA     | -1,0803   | 0,30494 | 0,064 | -2,1831 | 0,0224  |
|          | CROATIA      | -2,2780 * | 0,32146 | 0,000 | -3,4406 | -1,1155 |

|         |              |          |         |       |         |         |
|---------|--------------|----------|---------|-------|---------|---------|
|         | HUNGARY      | -1,6512* | 0,34077 | 0,000 | -2,8836 | -0,4189 |
|         | INDIA        | 0,3207   | 0,28868 | 1,000 | -0,7233 | 1,3647  |
|         | INDONESIA    | -0,7860  | 0,23114 | 0,098 | -1,6219 | 0,0499  |
|         | IRAN         | 0,6113   | 0,31042 | 0,947 | -0,5113 | 1,7339  |
|         | IRAQ         | 1,8407*  | 0,38100 | 0,000 | 0,4628  | 3,2185  |
|         | ITALY        | -2,4061* | 0,33138 | 0,000 | -3,6044 | -1,2077 |
|         | JORDAN       | 2,3604*  | 0,27541 | 0,000 | 1,3645  | 3,3564  |
|         | MALAYSIA     | 4,1177*  | 0,22439 | 0,000 | 3,3062  | 4,9292  |
|         | NIGERIA      | -0,2409  | 0,50915 | 1,000 | -2,0821 | 1,6004  |
|         | PAKISTAN     | 1,5518*  | 0,26964 | 0,000 | 0,5767  | 2,5269  |
|         | ROMANIA      | -1,7071* | 0,32433 | 0,000 | -2,8800 | -0,5342 |
|         | RUSSIA       | 0,2503   | 0,20779 | 1,000 | -0,5011 | 1,0017  |
|         | SAUDI ARABIA | 1,2189*  | 0,28200 | 0,003 | 0,1991  | 2,2387  |
|         | TANZANIA     | 2,2450*  | 0,29935 | 0,000 | 1,1625  | 3,3276  |
|         | TURKEY       | -0,4920  | 0,19119 | 0,597 | -1,1834 | 0,1994  |
|         | THAILAND     | 0,9307   | 0,31248 | 0,292 | -0,1994 | 2,0607  |
|         | USA          | -2,9682* | 0,25105 | 0,000 | -3,8761 | -2,0603 |
| CROATIA | ARMENIA      | 0,9297   | 0,81367 | 1,000 | -2,0128 | 3,8722  |
|         | BELARUS      | 2,3889*  | 0,43091 | 0,000 | 0,8306  | 3,9472  |
|         | BRAZIL       | -0,2703  | 0,33020 | 1,000 | -1,4644 | 0,9238  |
|         | BULGARIA     | 1,1977   | 0,36265 | 0,130 | -0,1138 | 2,5092  |
|         | CANADA       | 2,2780*  | 0,32146 | 0,000 | 1,1155  | 3,4406  |
|         | HUNGARY      | 0,6268   | 0,39326 | 0,996 | -0,7954 | 2,0490  |
|         | INDIA        | 2,5987*  | 0,34910 | 0,000 | 1,3363  | 3,8612  |
|         | INDONESIA    | 1,4920*  | 0,30324 | 0,000 | 0,3954  | 2,5887  |
|         | IRAN         | 2,8894*  | 0,36728 | 0,000 | 1,5612  | 4,2176  |
|         | IRAQ         | 4,1187*  | 0,42860 | 0,000 | 2,5688  | 5,6686  |
|         | ITALY        | -0,1280  | 0,38516 | 1,000 | -1,5209 | 1,2648  |
|         | JORDAN       | 4,6385*  | 0,33820 | 0,000 | 3,4154  | 5,8615  |
|         | MALAYSIA     | 6,3957*  | 0,29813 | 0,000 | 5,3176  | 7,4739  |
|         | NIGERIA      | 2,0372*  | 0,54568 | 0,034 | 0,0638  | 4,0105  |
|         | PAKISTAN     | 3,8298*  | 0,33353 | 0,000 | 2,6237  | 5,0360  |

|         |              |          |         |       |         |         |
|---------|--------------|----------|---------|-------|---------|---------|
|         | ROMANIA      | 0,5709   | 0,37911 | 0,998 | -0,8001 | 1,9419  |
|         | RUSSIA       | 2,5283*  | 0,28584 | 0,000 | 1,4946  | 3,5621  |
|         | SAUDI ARABIA | 3,4969*  | 0,34359 | 0,000 | 2,2544  | 4,7394  |
|         | TANZANIA     | 4,5230*  | 0,35797 | 0,000 | 3,2285  | 5,8176  |
|         | TURKEY       | 1,7860*  | 0,27401 | 0,000 | 0,7951  | 2,7769  |
|         | THAILAND     | 3,2087*  | 0,36902 | 0,000 | 1,8742  | 4,5432  |
|         | USA          | -0,6902  | 0,31868 | 0,873 | -1,8427 | 0,4623  |
| HUNGARY | ARMENIA      | 0,3029   | 0,82149 | 1,000 | -2,6679 | 3,2737  |
|         | BELARUS      | 1,7621*  | 0,44550 | 0,015 | 0,1510  | 3,3732  |
|         | BRAZIL       | -0,8971  | 0,34903 | 0,599 | -2,1593 | 0,3651  |
|         | BULGARIA     | 0,5709   | 0,37987 | 0,998 | -0,8028 | 1,9447  |
|         | CANADA       | 1,6512*  | 0,34077 | 0,000 | 0,4189  | 2,8836  |
|         | CROATIA      | -0,6268  | 0,39326 | 0,996 | -2,0490 | 0,7954  |
|         | INDIA        | 1,9719*  | 0,36695 | 0,000 | 0,6449  | 3,2990  |
|         | INDONESIA    | 0,8652   | 0,32364 | 0,516 | -0,3052 | 2,0356  |
|         | IRAN         | 2,2626*  | 0,38429 | 0,000 | 0,8728  | 3,6523  |
|         | IRAQ         | 3,4919*  | 0,44326 | 0,000 | 1,8889  | 5,0949  |
|         | ITALY        | -0,7548  | 0,40141 | 0,967 | -2,2065 | 0,6968  |
|         | JORDAN       | 4,0117*  | 0,35661 | 0,000 | 2,7221  | 5,3013  |
|         | MALAYSIA     | 5,7689*  | 0,31885 | 0,000 | 4,6158  | 6,9220  |
|         | NIGERIA      | 1,4104   | 0,55727 | 0,631 | -0,6049 | 3,4256  |
|         | PAKISTAN     | 3,2030*  | 0,35217 | 0,000 | 1,9295  | 4,4766  |
|         | ROMANIA      | -0,0559  | 0,39561 | 1,000 | -1,4865 | 1,3748  |
|         | RUSSIA       | 1,9015*  | 0,30740 | 0,000 | 0,7899  | 3,0132  |
|         | SAUDI ARABIA | 2,8701*  | 0,36172 | 0,000 | 1,5620  | 4,1782  |
|         | TANZANIA     | 3,8963*  | 0,37540 | 0,000 | 2,5387  | 5,2538  |
|         | TURKEY       | 1,1592*  | 0,29643 | 0,018 | 0,0872  | 2,2312  |
|         | THAILAND     | 2,5819*  | 0,38596 | 0,000 | 1,1862  | 3,9777  |
|         | USA          | -1,3170* | 0,33815 | 0,019 | -2,5399 | -0,0941 |
| INDIA   | ARMENIA      | -1,6690  | 0,80129 | 0,910 | -4,5668 | 1,2287  |
|         | BELARUS      | -0,2099  | 0,40704 | 1,000 | -1,6819 | 1,2621  |
|         | BRAZIL       | -2,8690* | 0,29838 | 0,000 | -3,9481 | -1,7900 |

|           |              |           |         |       |         |         |
|-----------|--------------|-----------|---------|-------|---------|---------|
|           | BULGARIA     | -1,4010 * | 0,33394 | 0,006 | -2,6086 | -0,1934 |
|           | CANADA       | -0,3207   | 0,28868 | 1,000 | -1,3647 | 0,7233  |
|           | CROATIA      | -2,5987 * | 0,34910 | 0,000 | -3,8612 | -1,3363 |
|           | HUNGARY      | -1,9719 * | 0,36695 | 0,000 | -3,2990 | -0,6449 |
|           | INDONESIA    | -1,1067 * | 0,26824 | 0,008 | -2,0768 | -0,1367 |
|           | IRAN         | 0,2906    | 0,33896 | 1,000 | -0,9352 | 1,5164  |
|           | IRAQ         | 1,5200 *  | 0,40459 | 0,031 | 0,0568  | 2,9831  |
|           | ITALY        | -2,7268 * | 0,35825 | 0,000 | -4,0223 | -1,4312 |
|           | JORDAN       | 2,0397 *  | 0,30721 | 0,000 | 0,9288  | 3,1507  |
|           | MALAYSIA     | 3,7970 *  | 0,26245 | 0,000 | 2,8479  | 4,7461  |
|           | NIGERIA      | -0,5616   | 0,52703 | 1,000 | -2,4675 | 1,3443  |
|           | PAKISTAN     | 1,2311 *  | 0,30205 | 0,009 | 0,1388  | 2,3234  |
|           | ROMANIA      | -2,0278 * | 0,35174 | 0,000 | -3,2998 | -0,7558 |
|           | RUSSIA       | -0,0704   | 0,24840 | 1,000 | -0,9687 | 0,8279  |
|           | SAUDI ARABIA | 0,8982    | 0,31313 | 0,367 | -0,2342 | 2,0305  |
|           | TANZANIA     | 1,9243 *  | 0,32884 | 0,000 | 0,7351  | 3,1135  |
|           | TURKEY       | -0,8127   | 0,23469 | 0,082 | -1,6615 | 0,0360  |
|           | THAILAND     | 0,6100    | 0,34084 | 0,981 | -0,6226 | 1,8426  |
|           | USA          | -3,2889 * | 0,28558 | 0,000 | -4,3217 | -2,2562 |
| INDONESIA | ARMENIA      | -0,5623   | 0,78240 | 1,000 | -3,3918 | 2,2671  |
|           | BELARUS      | 0,8968    | 0,36847 | 0,705 | -0,4357 | 2,2293  |
|           | BRAZIL       | -1,7623 * | 0,24315 | 0,000 | -2,6416 | -0,8830 |
|           | BULGARIA     | -0,2943   | 0,28566 | 1,000 | -1,3274 | 0,7387  |
|           | CANADA       | 0,7860    | 0,23114 | 0,098 | -0,0499 | 1,6219  |
|           | CROATIA      | -1,4920 * | 0,30324 | 0,000 | -2,5887 | -0,3954 |
|           | HUNGARY      | -0,8652   | 0,32364 | 0,516 | -2,0356 | 0,3052  |
|           | INDIA        | 1,1067 *  | 0,26824 | 0,008 | 0,1367  | 2,0768  |
|           | IRAN         | 1,3973 *  | 0,29151 | 0,000 | 0,3431  | 2,4515  |
|           | IRAQ         | 2,6267 *  | 0,36576 | 0,000 | 1,3040  | 3,9494  |
|           | ITALY        | -1,6201 * | 0,31374 | 0,000 | -2,7546 | -0,4855 |
|           | JORDAN       | 3,1464 *  | 0,25390 | 0,000 | 2,2282  | 4,0646  |
|           | MALAYSIA     | 4,9037 *  | 0,19740 | 0,000 | 4,1898  | 5,6176  |

|      |              |          |         |       |         |         |
|------|--------------|----------|---------|-------|---------|---------|
|      | NIGERIA      | 0,5451   | 0,49784 | 1,000 | -1,2552 | 2,3455  |
|      | PAKISTAN     | 2,3378*  | 0,24764 | 0,000 | 1,4423  | 3,2333  |
|      | ROMANIA      | -0,9211  | 0,30628 | 0,274 | -2,0287 | 0,1865  |
|      | RUSSIA       | 1,0363*  | 0,17830 | 0,000 | 0,3915  | 1,6811  |
|      | SAUDI ARABIA | 2,0049*  | 0,26104 | 0,000 | 1,0609  | 2,9488  |
|      | TANZANIA     | 3,0310*  | 0,27969 | 0,000 | 2,0196  | 4,0425  |
|      | TURKEY       | 0,2940   | 0,15865 | 0,972 | -0,2797 | 0,8677  |
|      | THAILAND     | 1,7167*  | 0,29370 | 0,000 | 0,6545  | 2,7788  |
|      | USA          | -2,1822* | 0,22725 | 0,000 | -3,0041 | -1,3604 |
| IRAN | ARMENIA      | -1,9597  | 0,80937 | 0,715 | -4,8866 | 0,9673  |
|      | BELARUS      | -0,5005  | 0,42274 | 1,000 | -2,0292 | 1,0283  |
|      | BRAZIL       | -3,1597* | 0,31947 | 0,000 | -4,3149 | -2,0044 |
|      | BULGARIA     | -1,6916* | 0,35290 | 0,000 | -2,9679 | -0,4154 |
|      | CANADA       | -0,6113  | 0,31042 | 0,947 | -1,7339 | 0,5113  |
|      | CROATIA      | -2,8894* | 0,36728 | 0,000 | -4,2176 | -1,5612 |
|      | HUNGARY      | -2,2626* | 0,38429 | 0,000 | -3,6523 | -0,8728 |
|      | INDIA        | -0,2906  | 0,33896 | 1,000 | -1,5164 | 0,9352  |
|      | INDONESIA    | -1,3973* | 0,29151 | 0,000 | -2,4515 | -0,3431 |
|      | IRAQ         | 1,2293   | 0,42038 | 0,328 | -0,2909 | 2,7496  |
|      | ITALY        | -3,0174* | 0,37599 | 0,000 | -4,3771 | -1,6577 |
|      | JORDAN       | 1,7491*  | 0,32773 | 0,000 | 0,5640  | 2,9343  |
|      | MALAYSIA     | 3,5064*  | 0,28619 | 0,000 | 2,4714  | 4,5413  |
|      | NIGERIA      | -0,8522  | 0,53925 | 0,996 | -2,8023 | 1,0979  |
|      | PAKISTAN     | 0,9405   | 0,32290 | 0,336 | -0,2272 | 2,1082  |
|      | ROMANIA      | -2,3184* | 0,36979 | 0,000 | -3,6557 | -0,9811 |
|      | RUSSIA       | -0,3610  | 0,27337 | 1,000 | -1,3496 | 0,6276  |
|      | SAUDI ARABIA | 0,6075   | 0,33328 | 0,977 | -0,5977 | 1,8128  |
|      | TANZANIA     | 1,6337*  | 0,34809 | 0,001 | 0,3749  | 2,8925  |
|      | TURKEY       | -1,1033* | 0,26097 | 0,005 | -2,0471 | -0,1596 |
|      | THAILAND     | 0,3193   | 0,35944 | 1,000 | -0,9805 | 1,6192  |
|      | USA          | -3,5796* | 0,30754 | 0,000 | -4,6917 | -2,4674 |
| IRAQ | ARMENIA      | -3,1890* | 0,83898 | 0,026 | -6,2230 | -0,1550 |

|       |              |           |         |       |         |         |
|-------|--------------|-----------|---------|-------|---------|---------|
|       | BELARUS      | -1,7298 * | 0,47698 | 0,048 | -3,4547 | -0,0049 |
|       | BRAZIL       | -4,3890 * | 0,38840 | 0,000 | -5,7936 | -2,9844 |
|       | BULGARIA     | -2,9210 * | 0,41634 | 0,000 | -4,4266 | -1,4153 |
|       | CANADA       | -1,8407 * | 0,38100 | 0,000 | -3,2185 | -0,4628 |
|       | CROATIA      | -4,1187 * | 0,42860 | 0,000 | -5,6686 | -2,5688 |
|       | HUNGARY      | -3,4919 * | 0,44326 | 0,000 | -5,0949 | -1,8889 |
|       | INDIA        | -1,5200 * | 0,40459 | 0,031 | -2,9831 | -0,0568 |
|       | INDONESIA    | -2,6267 * | 0,36576 | 0,000 | -3,9494 | -1,3040 |
|       | IRAN         | -1,2293   | 0,42038 | 0,328 | -2,7496 | 0,2909  |
|       | ITALY        | -4,2467 * | 0,43608 | 0,000 | -5,8237 | -2,6697 |
|       | JORDAN       | 0,5198    | 0,39523 | 1,000 | -0,9095 | 1,9491  |
|       | MALAYSIA     | 2,2770 *  | 0,36153 | 0,000 | 0,9696  | 3,5844  |
|       | NIGERIA      | -2,0815   | 0,58274 | 0,058 | -4,1889 | 0,0259  |
|       | PAKISTAN     | -0,2889   | 0,39123 | 1,000 | -1,7037 | 1,1260  |
|       | ROMANIA      | -3,5478 * | 0,43075 | 0,000 | -5,1055 | -1,9900 |
|       | RUSSIA       | -1,5904 * | 0,35147 | 0,001 | -2,8614 | -0,3193 |
|       | SAUDI ARABIA | -0,6218   | 0,39985 | 0,997 | -2,0678 | 0,8242  |
|       | TANZANIA     | 0,4044    | 0,41227 | 1,000 | -1,0865 | 1,8953  |
|       | TURKEY       | -2,3327 * | 0,34192 | 0,000 | -3,5692 | -1,0962 |
|       | THAILAND     | -0,9100   | 0,42190 | 0,877 | -2,4357 | 0,6157  |
|       | USA          | -4,8089 * | 0,37866 | 0,000 | -6,1783 | -3,4395 |
| ITALY | ARMENIA      | 1,0577    | 0,81764 | 1,000 | -1,8991 | 4,0146  |
|       | BELARUS      | 2,5169 *  | 0,43836 | 0,000 | 0,9316  | 4,1022  |
|       | BRAZIL       | -0,1423   | 0,33987 | 1,000 | -1,3713 | 1,0868  |
|       | BULGARIA     | 1,3257    | 0,37147 | 0,058 | -0,0176 | 2,6691  |
|       | CANADA       | 2,4061 *  | 0,33138 | 0,000 | 1,2077  | 3,6044  |
|       | CROATIA      | 0,1280    | 0,38516 | 1,000 | -1,2648 | 1,5209  |
|       | HUNGARY      | 0,7548    | 0,40141 | 0,967 | -0,6968 | 2,2065  |
|       | INDIA        | 2,7268 *  | 0,35825 | 0,000 | 1,4312  | 4,0223  |
|       | INDONESIA    | 1,6201 *  | 0,31374 | 0,000 | 0,4855  | 2,7546  |
|       | IRAN         | 3,0174 *  | 0,37599 | 0,000 | 1,6577  | 4,3771  |
|       | IRAQ         | 4,2467 *  | 0,43608 | 0,000 | 2,6697  | 5,8237  |



|        |              |           |         |       |         |         |
|--------|--------------|-----------|---------|-------|---------|---------|
|        | JORDAN       | 4,7665 *  | 0,34764 | 0,000 | 3,5093  | 6,0237  |
|        | MALAYSIA     | 6,5238 *  | 0,30880 | 0,000 | 5,4070  | 7,6405  |
|        | NIGERIA      | 2,1652 *  | 0,55158 | 0,017 | 0,1705  | 4,1599  |
|        | PAKISTAN     | 3,9579 *  | 0,34309 | 0,000 | 2,7171  | 5,1986  |
|        | ROMANIA      | 0,6989    | 0,38755 | 0,980 | -0,7026 | 2,1005  |
|        | RUSSIA       | 2,6564 *  | 0,29695 | 0,000 | 1,5825  | 3,7303  |
|        | SAUDI ARABIA | 3,6249 *  | 0,35289 | 0,000 | 2,3488  | 4,9011  |
|        | TANZANIA     | 4,6511 *  | 0,36690 | 0,000 | 3,3242  | 5,9779  |
|        | TURKEY       | 1,9140 *  | 0,28558 | 0,000 | 0,8813  | 2,9468  |
|        | THAILAND     | 3,3367 *  | 0,37769 | 0,000 | 1,9709  | 4,7026  |
|        | USA          | -0,5622   | 0,32868 | 0,989 | -1,7508 | 0,6264  |
| JORDAN | ARMENIA      | -3,7088 * | 0,79660 | 0,001 | -6,5896 | -0,8280 |
|        | BELARUS      | -2,2496 * | 0,39774 | 0,000 | -3,6879 | -0,8113 |
|        | BRAZIL       | -4,9088 * | 0,28556 | 0,000 | -5,9415 | -3,8761 |
|        | BULGARIA     | -3,4408 * | 0,32253 | 0,000 | -4,6071 | -2,2744 |
|        | CANADA       | -2,3604 * | 0,27541 | 0,000 | -3,3564 | -1,3645 |
|        | CROATIA      | -4,6385 * | 0,33820 | 0,000 | -5,8615 | -3,4154 |
|        | HUNGARY      | -4,0117 * | 0,35661 | 0,000 | -5,3013 | -2,7221 |
|        | INDIA        | -2,0397 * | 0,30721 | 0,000 | -3,1507 | -0,9288 |
|        | INDONESIA    | -3,1464 * | 0,25390 | 0,000 | -4,0646 | -2,2282 |
|        | IRAN         | -1,7491 * | 0,32773 | 0,000 | -2,9343 | -0,5640 |
|        | IRAQ         | -0,5198   | 0,39523 | 1,000 | -1,9491 | 0,9095  |
|        | ITALY        | -4,7665 * | 0,34764 | 0,000 | -6,0237 | -3,5093 |
|        | MALAYSIA     | 1,7573 *  | 0,24777 | 0,000 | 0,8612  | 2,6533  |
|        | NIGERIA      | -2,6013 * | 0,51988 | 0,000 | -4,4814 | -0,7213 |
|        | PAKISTAN     | -0,8086   | 0,28940 | 0,422 | -1,8552 | 0,2379  |
|        | ROMANIA      | -4,0676 * | 0,34093 | 0,000 | -5,3005 | -2,8346 |
|        | RUSSIA       | -2,1101 * | 0,23285 | 0,000 | -2,9522 | -1,2681 |
|        | SAUDI ARABIA | -1,1416 * | 0,30094 | 0,027 | -2,2299 | -0,0533 |
|        | TANZANIA     | -0,1154   | 0,31726 | 1,000 | -1,2627 | 1,0319  |
|        | TURKEY       | -2,8525 * | 0,21816 | 0,000 | -3,6414 | -2,0635 |

|          |              |           |         |       |         |         |
|----------|--------------|-----------|---------|-------|---------|---------|
|          | THAILAND     | -1,4298 * | 0,32968 | 0,003 | -2,6220 | -0,2375 |
|          | USA          | -5,3287 * | 0,27216 | 0,000 | -6,3129 | -4,3445 |
| MALAYSIA | ARMENIA      | -5,4660 * | 0,78043 | 0,000 | -8,2883 | -2,6437 |
|          | BELARUS      | -4,0069 * | 0,36427 | 0,000 | -5,3242 | -2,6895 |
|          | BRAZIL       | -6,6660 * | 0,23674 | 0,000 | -7,5222 | -5,8099 |
|          | BULGARIA     | -5,1980 * | 0,28023 | 0,000 | -6,2114 | -4,1846 |
|          | CANADA       | -4,1177 * | 0,22439 | 0,000 | -4,9292 | -3,3062 |
|          | CROATIA      | -6,3957 * | 0,29813 | 0,000 | -7,4739 | -5,3176 |
|          | HUNGARY      | -5,7689 * | 0,31885 | 0,000 | -6,9220 | -4,6158 |
|          | INDIA        | -3,7970 * | 0,26245 | 0,000 | -4,7461 | -2,8479 |
|          | INDONESIA    | -4,9037 * | 0,19740 | 0,000 | -5,6176 | -4,1898 |
|          | IRAN         | -3,5064 * | 0,28619 | 0,000 | -4,5413 | -2,4714 |
|          | IRAQ         | -2,2770 * | 0,36153 | 0,000 | -3,5844 | -0,9696 |
|          | ITALY        | -6,5238 * | 0,30880 | 0,000 | -7,6405 | -5,4070 |
|          | JORDAN       | -1,7573 * | 0,24777 | 0,000 | -2,6533 | -0,8612 |
|          | NIGERIA      | -4,3586 * | 0,49475 | 0,000 | -6,1477 | -2,5694 |
|          | PAKISTAN     | -2,5659 * | 0,24135 | 0,000 | -3,4387 | -1,6931 |
|          | ROMANIA      | -5,8248 * | 0,30122 | 0,000 | -6,9141 | -4,7355 |
|          | RUSSIA       | -3,8674 * | 0,16946 | 0,000 | -4,4802 | -3,2546 |
|          | SAUDI ARABIA | -2,8988 * | 0,25508 | 0,000 | -3,8213 | -1,9764 |
|          | TANZANIA     | -1,8727 * | 0,27414 | 0,000 | -2,8641 | -0,8813 |
|          | TURKEY       | -4,6097 * | 0,14864 | 0,000 | -5,1473 | -4,0722 |
|          | THAILAND     | -3,1870 * | 0,28842 | 0,000 | -4,2301 | -2,1440 |
|          | USA          | -7,0859 * | 0,22038 | 0,000 | -7,8829 | -6,2889 |
| NIGERIA  | ARMENIA      | -1,1075   | 0,90441 | 1,000 | -4,3781 | 2,1632  |
|          | BELARUS      | 0,3517    | 0,58445 | 1,000 | -1,7618 | 2,4653  |
|          | BRAZIL       | -2,3075 * | 0,51471 | 0,002 | -4,1688 | -0,4461 |
|          | BULGARIA     | -0,8394   | 0,53611 | 0,997 | -2,7782 | 1,0993  |
|          | CANADA       | 0,2409    | 0,50915 | 1,000 | -1,6004 | 2,0821  |
|          | CROATIA      | -2,0372 * | 0,54568 | 0,034 | -4,0105 | -0,0638 |
|          | HUNGARY      | -1,4104   | 0,55727 | 0,631 | -3,4256 | 0,6049  |

|          |              |           |         |       |         |         |
|----------|--------------|-----------|---------|-------|---------|---------|
|          | INDIA        | 0,5616    | 0,52703 | 1,000 | -1,3443 | 2,4675  |
|          | INDONESIA    | -0,5451   | 0,49784 | 1,000 | -2,3455 | 1,2552  |
|          | IRAN         | 0,8522    | 0,53925 | 0,996 | -1,0979 | 2,8023  |
|          | IRAQ         | 2,0815    | 0,58274 | 0,058 | -0,0259 | 4,1889  |
|          | ITALY        | -2,1652 * | 0,55158 | 0,017 | -4,1599 | -0,1705 |
|          | JORDAN       | 2,6013 *  | 0,51988 | 0,000 | 0,7213  | 4,4814  |
|          | MALAYSIA     | 4,3586 *  | 0,49475 | 0,000 | 2,5694  | 6,1477  |
|          | PAKISTAN     | 1,7927    | 0,51685 | 0,080 | -0,0764 | 3,6618  |
|          | ROMANIA      | -1,4662   | 0,54737 | 0,512 | -3,4457 | 0,5132  |
|          | RUSSIA       | 0,4912    | 0,48744 | 1,000 | -1,2716 | 2,2539  |
|          | SAUDI ARABIA | 1,4597    | 0,52340 | 0,426 | -0,4331 | 3,3525  |
|          | TANZANIA     | 2,4859 *  | 0,53295 | 0,001 | 0,5586  | 4,4132  |
|          | TURKEY       | -0,2512   | 0,48060 | 1,000 | -1,9892 | 1,4869  |
|          | THAILAND     | 1,1715    | 0,54043 | 0,872 | -0,7829 | 3,1259  |
|          | USA          | -2,7274 * | 0,50740 | 0,000 | -4,5623 | -0,8925 |
| PAKISTAN | ARMENIA      | -2,9001 * | 0,79463 | 0,045 | -5,7738 | -0,0265 |
|          | BELARUS      | -1,4410 * | 0,39377 | 0,043 | -2,8650 | -0,0170 |
|          | BRAZIL       | -4,1001 * | 0,28001 | 0,000 | -5,1127 | -3,0875 |
|          | BULGARIA     | -2,6321 * | 0,31762 | 0,000 | -3,7808 | -1,4835 |
|          | CANADA       | -1,5518 * | 0,26964 | 0,000 | -2,5269 | -0,5767 |
|          | CROATIA      | -3,8298 * | 0,33353 | 0,000 | -5,0360 | -2,6237 |
|          | HUNGARY      | -3,2030 * | 0,35217 | 0,000 | -4,4766 | -1,9295 |
|          | INDIA        | -1,2311 * | 0,30205 | 0,009 | -2,3234 | -0,1388 |
|          | INDONESIA    | -2,3378 * | 0,24764 | 0,000 | -3,2333 | -1,4423 |
|          | IRAN         | -0,9405   | 0,32290 | 0,336 | -2,1082 | 0,2272  |
|          | IRAQ         | 0,2889    | 0,39123 | 1,000 | -1,1260 | 1,7037  |
|          | ITALY        | -3,9579 * | 0,34309 | 0,000 | -5,1986 | -2,7171 |
|          | JORDAN       | 0,8086    | 0,28940 | 0,422 | -0,2379 | 1,8552  |
|          | MALAYSIA     | 2,5659 *  | 0,24135 | 0,000 | 1,6931  | 3,4387  |
|          | NIGERIA      | -1,7927   | 0,51685 | 0,080 | -3,6618 | 0,0764  |
|          | ROMANIA      | -3,2589 * | 0,33629 | 0,000 | -4,4751 | -2,0428 |
|          | RUSSIA       | -1,3015 * | 0,22600 | 0,000 | -2,1188 | -0,4842 |

|         |              |           |         |       |         |         |
|---------|--------------|-----------|---------|-------|---------|---------|
|         | SAUDI ARABIA | -0,3329   | 0,29567 | 1,000 | -1,4022 | 0,7363  |
|         | TANZANIA     | 0,6932    | 0,31227 | 0,845 | -0,4360 | 1,8225  |
|         | TURKEY       | -2,0438 * | 0,21084 | 0,000 | -2,8063 | -1,2814 |
|         | THAILAND     | -0,6211   | 0,32488 | 0,961 | -1,7960 | 0,5537  |
|         | USA          | -4,5200 * | 0,26632 | 0,000 | -5,4832 | -3,5569 |
| ROMANIA | ARMENIA      | 0,3588    | 0,81481 | 1,000 | -2,5879 | 3,3054  |
|         | BELARUS      | 1,8180 *  | 0,43305 | 0,006 | 0,2519  | 3,3840  |
|         | BRAZIL       | -0,8412   | 0,33300 | 0,634 | -2,0454 | 0,3630  |
|         | BULGARIA     | 0,6268    | 0,36520 | 0,989 | -0,6939 | 1,9475  |
|         | CANADA       | 1,7071 *  | 0,32433 | 0,000 | 0,5342  | 2,8800  |
|         | CROATIA      | -0,5709   | 0,37911 | 0,998 | -1,9419 | 0,8001  |
|         | HUNGARY      | 0,0559    | 0,39561 | 1,000 | -1,3748 | 1,4865  |
|         | INDIA        | 2,0278 *  | 0,35174 | 0,000 | 0,7558  | 3,2998  |
|         | INDONESIA    | 0,9211    | 0,30628 | 0,274 | -0,1865 | 2,0287  |
|         | IRAN         | 2,3184 *  | 0,36979 | 0,000 | 0,9811  | 3,6557  |
|         | IRAQ         | 3,5478 *  | 0,43075 | 0,000 | 1,9900  | 5,1055  |
|         | ITALY        | -0,6989   | 0,38755 | 0,980 | -2,1005 | 0,7026  |
|         | JORDAN       | 4,0676 *  | 0,34093 | 0,000 | 2,8346  | 5,3005  |
|         | MALAYSIA     | 5,8248 *  | 0,30122 | 0,000 | 4,7355  | 6,9141  |
|         | NIGERIA      | 1,4662    | 0,54737 | 0,512 | -0,5132 | 3,4457  |
|         | PAKISTAN     | 3,2589 *  | 0,33629 | 0,000 | 2,0428  | 4,4751  |
|         | RUSSIA       | 1,9574 *  | 0,28907 | 0,000 | 0,9121  | 3,0028  |
|         | SAUDI ARABIA | 2,9260 *  | 0,34628 | 0,000 | 1,6737  | 4,1782  |
|         | TANZANIA     | 3,9521 *  | 0,36055 | 0,000 | 2,6483  | 5,2560  |
|         | TURKEY       | 1,2151 *  | 0,27737 | 0,003 | 0,2120  | 2,2182  |
|         | THAILAND     | 2,6378 *  | 0,37152 | 0,000 | 1,2942  | 3,9813  |
|         | USA          | -1,2611 * | 0,32158 | 0,017 | -2,4241 | -0,0982 |
| RUSSIA  | ARMENIA      | -1,5986   | 0,77582 | 0,918 | -4,4043 | 1,2070  |
|         | BELARUS      | -0,1395   | 0,35429 | 1,000 | -1,4207 | 1,1418  |
|         | BRAZIL       | -2,7986 * | 0,22107 | 0,000 | -3,5981 | -1,9992 |
|         | BULGARIA     | -1,3306 * | 0,26712 | 0,000 | -2,2966 | -0,3646 |
|         | CANADA       | -0,2503   | 0,20779 | 1,000 | -1,0017 | 0,5011  |

|                 |              |           |         |       |         |         |
|-----------------|--------------|-----------|---------|-------|---------|---------|
|                 | CROATIA      | -2,5283 * | 0,28584 | 0,000 | -3,5621 | -1,4946 |
|                 | HUNGARY      | -1,9015 * | 0,30740 | 0,000 | -3,0132 | -0,7899 |
|                 | INDIA        | 0,0704    | 0,24840 | 1,000 | -0,8279 | 0,9687  |
|                 | INDONESIA    | -1,0363 * | 0,17830 | 0,000 | -1,6811 | -0,3915 |
|                 | IRAN         | 0,3610    | 0,27337 | 1,000 | -0,6276 | 1,3496  |
|                 | IRAQ         | 1,5904 *  | 0,35147 | 0,001 | 0,3193  | 2,8614  |
|                 | ITALY        | -2,6564 * | 0,29695 | 0,000 | -3,7303 | -1,5825 |
|                 | JORDAN       | 2,1101 *  | 0,23285 | 0,000 | 1,2681  | 2,9522  |
|                 | MALAYSIA     | 3,8674 *  | 0,16946 | 0,000 | 3,2546  | 4,4802  |
|                 | NIGERIA      | -0,4912   | 0,48744 | 1,000 | -2,2539 | 1,2716  |
|                 | PAKISTAN     | 1,3015 *  | 0,22600 | 0,000 | 0,4842  | 2,1188  |
|                 | ROMANIA      | -1,9574 * | 0,28907 | 0,000 | -3,0028 | -0,9121 |
|                 | SAUDI ARABIA | ,9685 *   | 0,24060 | 0,011 | 0,0984  | 1,8387  |
|                 | TANZANIA     | 1,9947 *  | 0,26072 | 0,000 | 1,0518  | 2,9376  |
|                 | TURKEY       | -,7423 *  | 0,12215 | 0,000 | -1,1841 | -0,3006 |
|                 | THAILAND     | 0,6804    | 0,27570 | 0,680 | -0,3167 | 1,6774  |
|                 | USA          | -3,2186 * | 0,20346 | 0,000 | -3,9543 | -2,4828 |
| SAUDI<br>ARABIA | ARMENIA      | -2,5672   | 0,79890 | 0,166 | -5,4563 | 0,3219  |
|                 | BELARUS      | -1,1080   | 0,40233 | 0,453 | -2,5630 | 0,3469  |
|                 | BRAZIL       | -3,7672 * | 0,29192 | 0,000 | -4,8229 | -2,7115 |
|                 | BULGARIA     | -2,2992 * | 0,32818 | 0,000 | -3,4860 | -1,1124 |
|                 | CANADA       | -1,2189 * | 0,28200 | 0,003 | -2,2387 | -0,1991 |
|                 | CROATIA      | -3,4969 * | 0,34359 | 0,000 | -4,7394 | -2,2544 |
|                 | HUNGARY      | -2,8701 * | 0,36172 | 0,000 | -4,1782 | -1,5620 |
|                 | INDIA        | -0,8982   | 0,31313 | 0,367 | -2,0305 | 0,2342  |
|                 | INDONESIA    | -2,0049 * | 0,26104 | 0,000 | -2,9488 | -1,0609 |
|                 | IRAN         | -0,6075   | 0,33328 | 0,977 | -1,8128 | 0,5977  |
|                 | IRAQ         | 0,6218    | 0,39985 | 0,997 | -0,8242 | 2,0678  |
|                 | ITALY        | -3,6249 * | 0,35289 | 0,000 | -4,9011 | -2,3488 |
|                 | JORDAN       | 1,1416 *  | 0,30094 | 0,027 | 0,0533  | 2,2299  |
|                 | MALAYSIA     | 2,8988 *  | 0,25508 | 0,000 | 1,9764  | 3,8213  |

|          |              |           |         |       |         |         |
|----------|--------------|-----------|---------|-------|---------|---------|
|          | NIGERIA      | -1,4597   | 0,52340 | 0,426 | -3,3525 | 0,4331  |
|          | PAKISTAN     | 0,3329    | 0,29567 | 1,000 | -0,7363 | 1,4022  |
|          | ROMANIA      | -2,9260 * | 0,34628 | 0,000 | -4,1782 | -1,6737 |
|          | RUSSIA       | -,9685 *  | 0,24060 | 0,011 | -1,8387 | -0,0984 |
|          | TANZANIA     | 1,0262    | 0,32299 | 0,182 | -0,1419 | 2,1942  |
|          | TURKEY       | -1,7109 * | 0,22642 | 0,000 | -2,5297 | -0,8921 |
|          | THAILAND     | -0,2882   | 0,33520 | 1,000 | -1,5004 | 0,9240  |
|          | USA          | -4,1871 * | 0,27882 | 0,000 | -5,1954 | -3,1788 |
| TANZANIA | ARMENIA      | -3,5934 * | 0,80519 | 0,002 | -6,5052 | -0,6815 |
|          | BELARUS      | -2,1342 * | 0,41467 | 0,000 | -3,6338 | -0,6346 |
|          | BRAZIL       | -4,7933 * | 0,30872 | 0,000 | -5,9098 | -3,6769 |
|          | BULGARIA     | -3,3253 * | 0,34320 | 0,000 | -4,5665 | -2,0842 |
|          | CANADA       | -2,2450 * | 0,29935 | 0,000 | -3,3276 | -1,1625 |
|          | CROATIA      | -4,5230 * | 0,35797 | 0,000 | -5,8176 | -3,2285 |
|          | HUNGARY      | -3,8963 * | 0,37540 | 0,000 | -5,2538 | -2,5387 |
|          | INDIA        | -1,9243 * | 0,32884 | 0,000 | -3,1135 | -0,7351 |
|          | INDONESIA    | -3,0310 * | 0,27969 | 0,000 | -4,0425 | -2,0196 |
|          | IRAN         | -1,6337 * | 0,34809 | 0,001 | -2,8925 | -0,3749 |
|          | IRAQ         | -0,4044   | 0,41227 | 1,000 | -1,8953 | 1,0865  |
|          | ITALY        | -4,6511 * | 0,36690 | 0,000 | -5,9779 | -3,3242 |
|          | JORDAN       | 0,1154    | 0,31726 | 1,000 | -1,0319 | 1,2627  |
|          | MALAYSIA     | 1,8727 *  | 0,27414 | 0,000 | 0,8813  | 2,8641  |
|          | NIGERIA      | -2,4859 * | 0,53295 | 0,001 | -4,4132 | -0,5586 |
|          | PAKISTAN     | -0,6932   | 0,31227 | 0,845 | -1,8225 | 0,4360  |
|          | ROMANIA      | -3,9521 * | 0,36055 | 0,000 | -5,2560 | -2,6483 |
|          | RUSSIA       | -1,9947 * | 0,26072 | 0,000 | -2,9376 | -1,0518 |
|          | SAUDI ARABIA | -1,0262   | 0,32299 | 0,182 | -2,1942 | 0,1419  |
|          | TURKEY       | -2,7370 * | 0,24770 | 0,000 | -3,6328 | -1,8413 |
|          | THAILAND     | -1,3143 * | 0,34992 | 0,031 | -2,5798 | -0,0489 |
|          | USA          | -5,2133 * | 0,29636 | 0,000 | -6,2850 | -4,1415 |
| TURKEY   | ARMENIA      | -0,8563   | 0,77154 | 1,000 | -3,6465 | 1,9338  |

|          |              |           |         |       |         |         |
|----------|--------------|-----------|---------|-------|---------|---------|
|          | BELARUS      | 0,6029    | 0,34481 | 0,986 | -0,6441 | 1,8498  |
|          | BRAZIL       | -2,0563 * | 0,20554 | 0,000 | -2,7996 | -1,3130 |
|          | BULGARIA     | -0,5883   | 0,25442 | 0,790 | -1,5084 | 0,3318  |
|          | CANADA       | 0,4920    | 0,19119 | 0,597 | -0,1994 | 1,1834  |
|          | CROATIA      | -1,7860 * | 0,27401 | 0,000 | -2,7769 | -0,7951 |
|          | HUNGARY      | -1,1592 * | 0,29643 | 0,018 | -2,2312 | -0,0872 |
|          | INDIA        | 0,8127    | 0,23469 | 0,082 | -0,0360 | 1,6615  |
|          | INDONESIA    | -0,2940   | 0,15865 | 0,972 | -0,8677 | 0,2797  |
|          | IRAN         | 1,1033 *  | 0,26097 | 0,005 | 0,1596  | 2,0471  |
|          | IRAQ         | 2,3327 *  | 0,34192 | 0,000 | 1,0962  | 3,5692  |
|          | ITALY        | -1,9140 * | 0,28558 | 0,000 | -2,9468 | -0,8813 |
|          | JORDAN       | 2,8525 *  | 0,21816 | 0,000 | 2,0635  | 3,6414  |
|          | MALAYSIA     | 4,6097 *  | 0,14864 | 0,000 | 4,0722  | 5,1473  |
|          | NIGERIA      | 0,2512    | 0,48060 | 1,000 | -1,4869 | 1,9892  |
|          | PAKISTAN     | 2,0438 *  | 0,21084 | 0,000 | 1,2814  | 2,8063  |
|          | ROMANIA      | -1,2151 * | 0,27737 | 0,003 | -2,2182 | -0,2120 |
|          | RUSSIA       | ,7423 *   | 0,12215 | 0,000 | 0,3006  | 1,1841  |
|          | SAUDI ARABIA | 1,7109 *  | 0,22642 | 0,000 | 0,8921  | 2,5297  |
|          | TANZANIA     | 2,7370 *  | 0,24770 | 0,000 | 1,8413  | 3,6328  |
|          | THAILAND     | 1,4227 *  | 0,26342 | 0,000 | 0,4701  | 2,3753  |
|          | USA          | -2,4762 * | 0,18647 | 0,000 | -3,1506 | -1,8019 |
| THAILAND | ARMENIA      | -2,2790   | 0,81017 | 0,407 | -5,2088 | 0,6508  |
|          | BELARUS      | -0,8198   | 0,42425 | 0,956 | -2,3541 | 0,7144  |
|          | BRAZIL       | -3,4790 * | 0,32147 | 0,000 | -4,6415 | -2,3165 |
|          | BULGARIA     | -2,0110 * | 0,35472 | 0,000 | -3,2938 | -0,7282 |
|          | CANADA       | -0,9307   | 0,31248 | 0,292 | -2,0607 | 0,1994  |
|          | CROATIA      | -3,2087 * | 0,36902 | 0,000 | -4,5432 | -1,8742 |
|          | HUNGARY      | -2,5819 * | 0,38596 | 0,000 | -3,9777 | -1,1862 |
|          | INDIA        | -0,6100   | 0,34084 | 0,981 | -1,8426 | 0,6226  |
|          | INDONESIA    | -1,7167 * | 0,29370 | 0,000 | -2,7788 | -0,6545 |
|          | IRAN         | -0,3193   | 0,35944 | 1,000 | -1,6192 | 0,9805  |
|          | IRAQ         | 0,9100    | 0,42190 | 0,877 | -0,6157 | 2,4357  |

|     |              |           |         |       |         |         |
|-----|--------------|-----------|---------|-------|---------|---------|
|     | ITALY        | -3,3367 * | 0,37769 | 0,000 | -4,7026 | -1,9709 |
|     | JORDAN       | 1,4298 *  | 0,32968 | 0,003 | 0,2375  | 2,6220  |
|     | MALAYSIA     | 3,1870 *  | 0,28842 | 0,000 | 2,1440  | 4,2301  |
|     | NIGERIA      | -1,1715   | 0,54043 | 0,872 | -3,1259 | 0,7829  |
|     | PAKISTAN     | 0,6211    | 0,32488 | 0,961 | -0,5537 | 1,7960  |
|     | ROMANIA      | -2,6378 * | 0,37152 | 0,000 | -3,9813 | -1,2942 |
|     | RUSSIA       | -0,6804   | 0,27570 | 0,680 | -1,6774 | 0,3167  |
|     | SAUDI ARABIA | 0,2882    | 0,33520 | 1,000 | -0,9240 | 1,5004  |
|     | TANZANIA     | 1,3143 *  | 0,34992 | 0,031 | 0,0489  | 2,5798  |
|     | TURKEY       | -1,4227 * | 0,26342 | 0,000 | -2,3753 | -0,4701 |
|     | USA          | -3,8989 * | 0,30962 | 0,000 | -5,0186 | -2,7792 |
| USA | ARMENIA      | 1,6199    | 0,78851 | 0,920 | -1,2316 | 4,4714  |
|     | BELARUS      | 3,0791 *  | 0,38128 | 0,000 | 1,7003  | 4,4579  |
|     | BRAZIL       | 0,4199    | 0,26215 | 0,995 | -0,5281 | 1,3679  |
|     | BULGARIA     | 1,8879 *  | 0,30200 | 0,000 | 0,7958  | 2,9801  |
|     | CANADA       | 2,9682 *  | 0,25105 | 0,000 | 2,0603  | 3,8761  |
|     | CROATIA      | 0,6902    | 0,31868 | 0,873 | -0,4623 | 1,8427  |
|     | HUNGARY      | 1,3170 *  | 0,33815 | 0,019 | 0,0941  | 2,5399  |
|     | INDIA        | 3,2889 *  | 0,28558 | 0,000 | 2,2562  | 4,3217  |
|     | INDONESIA    | 2,1822 *  | 0,22725 | 0,000 | 1,3604  | 3,0041  |
|     | IRAN         | 3,5796 *  | 0,30754 | 0,000 | 2,4674  | 4,6917  |
|     | IRAQ         | 4,8089 *  | 0,37866 | 0,000 | 3,4395  | 6,1783  |
|     | ITALY        | 0,5622    | 0,32868 | 0,989 | -0,6264 | 1,7508  |
|     | JORDAN       | 5,3287 *  | 0,27216 | 0,000 | 4,3445  | 6,3129  |
|     | MALAYSIA     | 7,0859 *  | 0,22038 | 0,000 | 6,2889  | 7,8829  |
|     | NIGERIA      | 2,7274 *  | 0,50740 | 0,000 | 0,8925  | 4,5623  |
|     | PAKISTAN     | 4,5200 *  | 0,26632 | 0,000 | 3,5569  | 5,4832  |
|     | ROMANIA      | 1,2611 *  | 0,32158 | 0,017 | 0,0982  | 2,4241  |
|     | RUSSIA       | 3,2186 *  | 0,20346 | 0,000 | 2,4828  | 3,9543  |
|     | SAUDI ARABIA | 4,1871 *  | 0,27882 | 0,000 | 3,1788  | 5,1954  |
|     | TANZANIA     | 5,2133 *  | 0,29636 | 0,000 | 4,1415  | 6,2850  |



|                  |         |              |           |         |       |         |         |
|------------------|---------|--------------|-----------|---------|-------|---------|---------|
| Empathic Concern | ARMENIA | TURKEY       | 2,4762 *  | 0,18647 | 0,000 | 1,8019  | 3,1506  |
|                  |         | THAILAND     | 3,8989 *  | 0,30962 | 0,000 | 2,7792  | 5,0186  |
|                  |         | BELARUS      | 0,2677    | 0,87578 | 1,000 | -2,8994 | 3,4349  |
|                  |         | BRAZIL       | -4,7321 * | 0,82687 | 0,000 | -7,7224 | -1,7419 |
|                  |         | BULGARIA     | -1,3274   | 0,84151 | 0,996 | -4,3706 | 1,7158  |
|                  |         | CANADA       | 0,6884    | 0,82312 | 1,000 | -2,2883 | 3,6651  |
|                  |         | CROATIA      | -2,4497   | 0,84817 | 0,353 | -5,5170 | 0,6176  |
|                  |         | HUNGARY      | -3,4051 * | 0,85632 | 0,014 | -6,5019 | -0,3084 |
|                  |         | INDIA        | -0,6709   | 0,83526 | 1,000 | -3,6914 | 2,3497  |
|                  |         | INDONESIA    | -2,5838   | 0,81557 | 0,187 | -5,5332 | 0,3655  |
|                  |         | IRAN         | -0,5921   | 0,84369 | 1,000 | -3,6431 | 2,4590  |
|                  |         | IRAQ         | 0,6788    | 0,87455 | 1,000 | -2,4839 | 3,8414  |
|                  |         | ITALY        | -3,5620 * | 0,85230 | 0,006 | -6,6443 | -0,4798 |
|                  |         | JORDAN       | 1,6683    | 0,83037 | 0,936 | -1,3346 | 4,6712  |
|                  |         | MALAYSIA     | 5,7023 *  | 0,81352 | 0,000 | 2,7603  | 8,6442  |
|                  |         | NIGERIA      | -1,7086   | 0,94275 | 0,978 | -5,1179 | 1,7007  |
|                  |         | PAKISTAN     | 0,5944    | 0,82831 | 1,000 | -2,4011 | 3,5898  |
|                  |         | ROMANIA      | -1,9619   | 0,84935 | 0,792 | -5,0334 | 1,1097  |
|                  |         | RUSSIA       | 0,2793    | 0,80871 | 1,000 | -2,6453 | 3,2039  |
|                  |         | SAUDI ARABIA | -0,0545   | 0,83277 | 1,000 | -3,0660 | 2,9571  |
|                  |         | TANZANIA     | 2,7019    | 0,83933 | 0,163 | -0,3334 | 5,7371  |
|                  |         | TURKEY       | 0,7964    | 0,80425 | 1,000 | -2,1120 | 3,7049  |
|                  |         | THAILAND     | 0,2261    | 0,84451 | 1,000 | -2,8279 | 3,2801  |
|                  |         | USA          | -4,8351 * | 0,82194 | 0,000 | -7,8075 | -1,8627 |
|                  | BELARUS | ARMENIA      | -0,2677   | 0,87578 | 1,000 | -3,4349 | 2,8994  |
|                  |         | BRAZIL       | -4,9999 * | 0,40753 | 0,000 | -6,4736 | -3,5261 |
|                  |         | BULGARIA     | -1,5951 * | 0,43648 | 0,044 | -3,1736 | -0,0167 |
|                  |         | CANADA       | 0,4207    | 0,39987 | 1,000 | -1,0254 | 1,8667  |
|                  |         | CROATIA      | -2,7174 * | 0,44918 | 0,000 | -4,3418 | -1,0931 |
|                  |         | HUNGARY      | -3,6729 * | 0,46439 | 0,000 | -5,3522 | -1,9935 |
|                  |         | INDIA        | -0,9386   | 0,42430 | 0,849 | -2,4730 | 0,5958  |
|                  |         | INDONESIA    | -2,8516 * | 0,38409 | 0,000 | -4,2406 | -1,4626 |
|                  |         | IRAN         | -0,8598   | 0,44066 | 0,952 | -2,4534 | 0,7338  |

|        |              |          |         |       |         |         |
|--------|--------------|----------|---------|-------|---------|---------|
|        | IRAQ         | 0,4110   | 0,49720 | 1,000 | -1,3870 | 2,2091  |
|        | ITALY        | -3,8298* | 0,45694 | 0,000 | -5,4822 | -2,1773 |
|        | JORDAN       | 1,4006   | 0,41460 | 0,105 | -0,0988 | 2,8999  |
|        | MALAYSIA     | 5,4346*  | 0,37972 | 0,000 | 4,0614  | 6,8077  |
|        | NIGERIA      | -1,9763  | 0,60922 | 0,153 | -4,1795 | 0,2268  |
|        | PAKISTAN     | 0,3266   | 0,41046 | 1,000 | -1,1577 | 1,8110  |
|        | ROMANIA      | -2,2296* | 0,45141 | 0,000 | -3,8621 | -0,5972 |
|        | RUSSIA       | 0,0116   | 0,36931 | 1,000 | -1,3240 | 1,3471  |
|        | SAUDI ARABIA | -0,3222  | 0,41938 | 1,000 | -1,8388 | 1,1944  |
|        | TANZANIA     | 2,4341*  | 0,43225 | 0,000 | 0,8709  | 3,9973  |
|        | TURKEY       | 0,5287   | 0,35943 | 0,999 | -0,7711 | 1,8285  |
|        | THAILAND     | -0,0416  | 0,44224 | 1,000 | -1,6409 | 1,5577  |
|        | USA          | -5,1029* | 0,39744 | 0,000 | -6,5401 | -3,6656 |
| BRAZIL | ARMENIA      | 4,7321*  | 0,82687 | 0,000 | 1,7419  | 7,7224  |
|        | BELARUS      | 4,9999*  | 0,40753 | 0,000 | 3,5261  | 6,4736  |
|        | BULGARIA     | 3,4047*  | 0,32745 | 0,000 | 2,2205  | 4,5889  |
|        | CANADA       | 5,4205*  | 0,27678 | 0,000 | 4,4196  | 6,4215  |
|        | CROATIA      | 2,2824*  | 0,34420 | 0,000 | 1,0377  | 3,5272  |
|        | HUNGARY      | 1,3270*  | 0,36383 | 0,045 | 0,0113  | 2,6427  |
|        | INDIA        | 4,0613*  | 0,31103 | 0,000 | 2,9365  | 5,1861  |
|        | INDONESIA    | 2,1483*  | 0,25346 | 0,000 | 1,2317  | 3,0649  |
|        | IRAN         | 4,1401*  | 0,33301 | 0,000 | 2,9358  | 5,3443  |
|        | IRAQ         | 5,4109*  | 0,40487 | 0,000 | 3,9467  | 6,8750  |
|        | ITALY        | 1,1701   | 0,35428 | 0,130 | -0,1111 | 2,4513  |
|        | JORDAN       | 6,4004*  | 0,29767 | 0,000 | 5,3239  | 7,4769  |
|        | MALAYSIA     | 10,4344* | 0,24678 | 0,000 | 9,5420  | 11,3268 |
|        | NIGERIA      | 3,0235*  | 0,53653 | 0,000 | 1,0832  | 4,9638  |
|        | PAKISTAN     | 5,3265*  | 0,29188 | 0,000 | 4,2709  | 6,3820  |
|        | ROMANIA      | 2,7702*  | 0,34712 | 0,000 | 1,5149  | 4,0255  |
|        | RUSSIA       | 5,0114*  | 0,23044 | 0,000 | 4,1781  | 5,8448  |
|        | SAUDI ARABIA | 4,6777*  | 0,30430 | 0,000 | 3,5772  | 5,7781  |

|          |              |           |         |       |         |         |
|----------|--------------|-----------|---------|-------|---------|---------|
|          | TANZANIA     | 7,4340 *  | 0,32180 | 0,000 | 6,2702  | 8,5977  |
|          | TURKEY       | 5,5286 *  | 0,21426 | 0,000 | 4,7537  | 6,3034  |
|          | THAILAND     | 4,9582 *  | 0,33510 | 0,000 | 3,7464  | 6,1701  |
|          | USA          | -0,1030   | 0,27327 | 1,000 | -1,0912 | 0,8852  |
| BULGARIA | ARMENIA      | 1,3274    | 0,84151 | 0,996 | -1,7158 | 4,3706  |
|          | BELARUS      | 1,5951 *  | 0,43648 | 0,044 | 0,0167  | 3,1736  |
|          | BRAZIL       | -3,4047 * | 0,32745 | 0,000 | -4,5889 | -2,2205 |
|          | CANADA       | 2,0158 *  | 0,31786 | 0,000 | 0,8663  | 3,1653  |
|          | CROATIA      | -1,1223   | 0,37803 | 0,298 | -2,4894 | 0,2448  |
|          | HUNGARY      | -2,0777 * | 0,39598 | 0,000 | -3,5097 | -0,6457 |
|          | INDIA        | 0,6565    | 0,34809 | 0,966 | -0,6023 | 1,9154  |
|          | INDONESIA    | -1,2564 * | 0,29777 | 0,005 | -2,3333 | -0,1796 |
|          | IRAN         | 0,7354    | 0,36786 | 0,939 | -0,5950 | 2,0657  |
|          | IRAQ         | 2,0062 *  | 0,43399 | 0,001 | 0,4367  | 3,5756  |
|          | ITALY        | -2,2346 * | 0,38722 | 0,000 | -3,6350 | -0,8343 |
|          | JORDAN       | 2,9957 *  | 0,33621 | 0,000 | 1,7799  | 4,2115  |
|          | MALAYSIA     | 7,0297 *  | 0,29211 | 0,000 | 5,9733  | 8,0861  |
|          | NIGERIA      | -0,3812   | 0,55883 | 1,000 | -2,4021 | 1,6397  |
|          | PAKISTAN     | 1,9218 *  | 0,33109 | 0,000 | 0,7244  | 3,1191  |
|          | ROMANIA      | -0,6345   | 0,38068 | 0,992 | -2,0112 | 0,7422  |
|          | RUSSIA       | 1,6067 *  | 0,27844 | 0,000 | 0,5997  | 2,6136  |
|          | SAUDI ARABIA | 1,2729 *  | 0,34209 | 0,035 | 0,0358  | 2,5101  |
|          | TANZANIA     | 4,0293 *  | 0,35775 | 0,000 | 2,7355  | 5,3230  |
|          | TURKEY       | 2,1238 *  | 0,26521 | 0,000 | 1,1648  | 3,0829  |
|          | THAILAND     | 1,5535 *  | 0,36975 | 0,006 | 0,2164  | 2,8907  |
|          | USA          | -3,5077 * | 0,31480 | 0,000 | -4,6462 | -2,3693 |
| CANADA   | ARMENIA      | -0,6884   | 0,82312 | 1,000 | -3,6651 | 2,2883  |
|          | BELARUS      | -0,4207   | 0,39987 | 1,000 | -1,8667 | 1,0254  |
|          | BRAZIL       | -5,4205 * | 0,27678 | 0,000 | -6,4215 | -4,4196 |
|          | BULGARIA     | -2,0158 * | 0,31786 | 0,000 | -3,1653 | -0,8663 |
|          | CROATIA      | -3,1381 * | 0,33509 | 0,000 | -4,3499 | -1,9263 |

|         |              |           |         |       |         |         |
|---------|--------------|-----------|---------|-------|---------|---------|
|         | HUNGARY      | -4,0935 * | 0,35522 | 0,000 | -5,3781 | -2,8089 |
|         | INDIA        | -1,3593 * | 0,30092 | 0,001 | -2,4475 | -0,2710 |
|         | INDONESIA    | -3,2722 * | 0,24094 | 0,000 | -4,1435 | -2,4009 |
|         | IRAN         | -1,2805 * | 0,32358 | 0,015 | -2,4506 | -0,1103 |
|         | IRAQ         | -0,0097   | 0,39715 | 1,000 | -1,4459 | 1,4266  |
|         | ITALY        | -4,2505 * | 0,34543 | 0,000 | -5,4997 | -3,0013 |
|         | JORDAN       | 0,9799    | 0,28708 | 0,095 | -0,0583 | 2,0181  |
|         | MALAYSIA     | 5,0139 *  | 0,23390 | 0,000 | 4,1680  | 5,8597  |
|         | NIGERIA      | -2,3970 * | 0,53073 | 0,001 | -4,3163 | -0,4777 |
|         | PAKISTAN     | -0,0941   | 0,28108 | 1,000 | -1,1105 | 0,9224  |
|         | ROMANIA      | -2,6503 * | 0,33808 | 0,000 | -3,8729 | -1,4277 |
|         | RUSSIA       | -0,4091   | 0,21660 | 0,966 | -1,1924 | 0,3742  |
|         | SAUDI ARABIA | -0,7429   | 0,29395 | 0,634 | -1,8059 | 0,3202  |
|         | TANZANIA     | 2,0134 *  | 0,31204 | 0,000 | 0,8850  | 3,1419  |
|         | TURKEY       | 0,1080    | 0,19929 | 1,000 | -0,6127 | 0,8287  |
|         | THAILAND     | -0,4623   | 0,32573 | 0,999 | -1,6403 | 0,7156  |
|         | USA          | -5,5235 * | 0,26170 | 0,000 | -6,4699 | -4,5771 |
| CROATIA | ARMENIA      | 2,4497    | 0,84817 | 0,353 | -0,6176 | 5,5170  |
|         | BELARUS      | 2,7174 *  | 0,44918 | 0,000 | 1,0931  | 4,3418  |
|         | BRAZIL       | -2,2824 * | 0,34420 | 0,000 | -3,5272 | -1,0377 |
|         | BULGARIA     | 1,1223    | 0,37803 | 0,298 | -0,2448 | 2,4894  |
|         | CANADA       | 3,1381 *  | 0,33509 | 0,000 | 1,9263  | 4,3499  |
|         | HUNGARY      | -0,9554   | 0,40994 | 0,778 | -2,4379 | 0,5270  |
|         | INDIA        | 1,7788 *  | 0,36390 | 0,000 | 0,4629  | 3,0948  |
|         | INDONESIA    | -0,1341   | 0,31610 | 1,000 | -1,2772 | 1,0090  |
|         | IRAN         | 1,8576 *  | 0,38285 | 0,000 | 0,4731  | 3,2422  |
|         | IRAQ         | 3,1284 *  | 0,44677 | 0,000 | 1,5128  | 4,7441  |
|         | ITALY        | -1,1124   | 0,40148 | 0,440 | -2,5643 | 0,3395  |
|         | JORDAN       | 4,1180 *  | 0,35254 | 0,000 | 2,8431  | 5,3929  |
|         | MALAYSIA     | 8,1520 *  | 0,31077 | 0,000 | 7,0281  | 9,2758  |
|         | NIGERIA      | 0,7411    | 0,56881 | 1,000 | -1,3159 | 2,7981  |
|         | PAKISTAN     | 3,0440 *  | 0,34767 | 0,000 | 1,7868  | 4,3013  |

|         |              |          |         |       |         |         |
|---------|--------------|----------|---------|-------|---------|---------|
|         | ROMANIA      | 0,4878   | 0,39518 | 1,000 | -0,9413 | 1,9169  |
|         | RUSSIA       | 2,7290*  | 0,29796 | 0,000 | 1,6515  | 3,8065  |
|         | SAUDI ARABIA | 2,3952*  | 0,35816 | 0,000 | 1,1000  | 3,6905  |
|         | TANZANIA     | 5,1516*  | 0,37314 | 0,000 | 3,8021  | 6,5010  |
|         | TURKEY       | 3,2461*  | 0,28563 | 0,000 | 2,2132  | 4,2791  |
|         | THAILAND     | 2,6758*  | 0,38467 | 0,000 | 1,2847  | 4,0669  |
|         | USA          | -2,3854* | 0,33219 | 0,000 | -3,5867 | -1,1841 |
| HUNGARY | ARMENIA      | 3,4051*  | 0,85632 | 0,014 | 0,3084  | 6,5019  |
|         | BELARUS      | 3,6729*  | 0,46439 | 0,000 | 1,9935  | 5,3522  |
|         | BRAZIL       | -1,3270* | 0,36383 | 0,045 | -2,6427 | -0,0113 |
|         | BULGARIA     | 2,0777*  | 0,39598 | 0,000 | 0,6457  | 3,5097  |
|         | CANADA       | 4,0935*  | 0,35522 | 0,000 | 2,8089  | 5,3781  |
|         | CROATIA      | 0,9554   | 0,40994 | 0,778 | -0,5270 | 2,4379  |
|         | INDIA        | 2,7343*  | 0,38251 | 0,000 | 1,3510  | 4,1175  |
|         | INDONESIA    | 0,8213   | 0,33736 | 0,705 | -0,3987 | 2,0413  |
|         | IRAN         | 2,8131*  | 0,40058 | 0,000 | 1,3644  | 4,2617  |
|         | IRAQ         | 4,0839*  | 0,46205 | 0,000 | 2,4129  | 5,7548  |
|         | ITALY        | -0,1569  | 0,41843 | 1,000 | -1,6701 | 1,3563  |
|         | JORDAN       | 5,0734*  | 0,37172 | 0,000 | 3,7291  | 6,4177  |
|         | MALAYSIA     | 9,1074*  | 0,33237 | 0,000 | 7,9055  | 10,3094 |
|         | NIGERIA      | 1,6965   | 0,58090 | 0,330 | -0,4042 | 3,7972  |
|         | PAKISTAN     | 3,9995*  | 0,36710 | 0,000 | 2,6719  | 5,3270  |
|         | ROMANIA      | 1,4432   | 0,41239 | 0,073 | -0,0481 | 2,9346  |
|         | RUSSIA       | 3,6844*  | 0,32043 | 0,000 | 2,5256  | 4,8432  |
|         | SAUDI ARABIA | 3,3507*  | 0,37705 | 0,000 | 1,9871  | 4,7142  |
|         | TANZANIA     | 6,1070*  | 0,39132 | 0,000 | 4,6918  | 7,5221  |
|         | TURKEY       | 4,2016*  | 0,30900 | 0,000 | 3,0841  | 5,3190  |
|         | THAILAND     | 3,6312*  | 0,40232 | 0,000 | 2,1763  | 5,0862  |
|         | USA          | -1,4300* | 0,35249 | 0,010 | -2,7047 | -0,1553 |
| INDIA   | ARMENIA      | 0,6709   | 0,83526 | 1,000 | -2,3497 | 3,6914  |
|         | BELARUS      | 0,9386   | 0,42430 | 0,849 | -0,5958 | 2,4730  |

|           |              |           |         |       |         |         |
|-----------|--------------|-----------|---------|-------|---------|---------|
|           | BRAZIL       | -4,0613 * | 0,31103 | 0,000 | -5,1861 | -2,9365 |
|           | BULGARIA     | -0,6565   | 0,34809 | 0,966 | -1,9154 | 0,6023  |
|           | CANADA       | 1,3593 *  | 0,30092 | 0,001 | 0,2710  | 2,4475  |
|           | CROATIA      | -1,7788 * | 0,36390 | 0,000 | -3,0948 | -0,4629 |
|           | HUNGARY      | -2,7343 * | 0,38251 | 0,000 | -4,1175 | -1,3510 |
|           | INDONESIA    | -1,9130 * | 0,27961 | 0,000 | -2,9241 | -0,9018 |
|           | IRAN         | 0,0788    | 0,35333 | 1,000 | -1,1989 | 1,3566  |
|           | IRAQ         | 1,3496    | 0,42174 | 0,172 | -0,1755 | 2,8748  |
|           | ITALY        | -2,8912 * | 0,37344 | 0,000 | -4,2417 | -1,5407 |
|           | JORDAN       | 2,3391 *  | 0,32023 | 0,000 | 1,1811  | 3,4972  |
|           | MALAYSIA     | 6,3732 *  | 0,27357 | 0,000 | 5,3838  | 7,3625  |
|           | NIGERIA      | -1,0377   | 0,54937 | 0,966 | -3,0245 | 0,9490  |
|           | PAKISTAN     | 1,2652 *  | 0,31486 | 0,012 | 0,1266  | 2,4039  |
|           | ROMANIA      | -1,2910   | 0,36665 | 0,068 | -2,6170 | 0,0349  |
|           | RUSSIA       | ,9501 *   | 0,25893 | 0,042 | 0,0138  | 1,8865  |
|           | SAUDI ARABIA | 0,6164    | 0,32641 | 0,966 | -0,5640 | 1,7968  |
|           | TANZANIA     | 3,3727 *  | 0,34279 | 0,000 | 2,1331  | 4,6123  |
|           | TURKEY       | 1,4673 *  | 0,24464 | 0,000 | 0,5826  | 2,3520  |
|           | THAILAND     | 0,8970    | 0,35529 | 0,636 | -0,3879 | 2,1818  |
|           | USA          | -4,1643 * | 0,29769 | 0,000 | -5,2408 | -3,0877 |
| INDONESIA | ARMENIA      | 2,5838    | 0,81557 | 0,187 | -0,3655 | 5,5332  |
|           | BELARUS      | 2,8516 *  | 0,38409 | 0,000 | 1,4626  | 4,2406  |
|           | BRAZIL       | -2,1483 * | 0,25346 | 0,000 | -3,0649 | -1,2317 |
|           | BULGARIA     | 1,2564 *  | 0,29777 | 0,005 | 0,1796  | 2,3333  |
|           | CANADA       | 3,2722 *  | 0,24094 | 0,000 | 2,4009  | 4,1435  |
|           | CROATIA      | 0,1341    | 0,31610 | 1,000 | -1,0090 | 1,2772  |
|           | HUNGARY      | -0,8213   | 0,33736 | 0,705 | -2,0413 | 0,3987  |
|           | INDIA        | 1,9130 *  | 0,27961 | 0,000 | 0,9018  | 2,9241  |
|           | IRAN         | 1,9918 *  | 0,30387 | 0,000 | 0,8929  | 3,0907  |
|           | IRAQ         | 3,2626 *  | 0,38126 | 0,000 | 1,8838  | 4,6414  |
|           | ITALY        | -0,9782   | 0,32704 | 0,284 | -2,1609 | 0,2044  |

|      |              |           |         |       |         |         |
|------|--------------|-----------|---------|-------|---------|---------|
|      | JORDAN       | 4,2521 *  | 0,26467 | 0,000 | 3,2950  | 5,2092  |
|      | MALAYSIA     | 8,2861 *  | 0,20577 | 0,000 | 7,5420  | 9,0302  |
|      | NIGERIA      | 0,8752    | 0,51895 | 0,991 | -1,0015 | 2,7519  |
|      | PAKISTAN     | 3,1782 *  | 0,25814 | 0,000 | 2,2447  | 4,1117  |
|      | ROMANIA      | 0,6219    | 0,31927 | 0,953 | -0,5326 | 1,7765  |
|      | RUSSIA       | 2,8631 *  | 0,18586 | 0,000 | 2,1910  | 3,5353  |
|      | SAUDI ARABIA | 2,5294 *  | 0,27210 | 0,000 | 1,5454  | 3,5134  |
|      | TANZANIA     | 5,2857 *  | 0,29155 | 0,000 | 4,2313  | 6,3400  |
|      | TURKEY       | 3,3803 *  | 0,16537 | 0,000 | 2,7822  | 3,9783  |
|      | THAILAND     | 2,8099 *  | 0,30616 | 0,000 | 1,7028  | 3,9171  |
|      | USA          | -2,2513 * | 0,23689 | 0,000 | -3,1080 | -1,3946 |
| IRAN | ARMENIA      | 0,5921    | 0,84369 | 1,000 | -2,4590 | 3,6431  |
|      | BELARUS      | 0,8598    | 0,44066 | 0,952 | -0,7338 | 2,4534  |
|      | BRAZIL       | -4,1401 * | 0,33301 | 0,000 | -5,3443 | -2,9358 |
|      | BULGARIA     | -0,7354   | 0,36786 | 0,939 | -2,0657 | 0,5950  |
|      | CANADA       | 1,2805 *  | 0,32358 | 0,015 | 0,1103  | 2,4506  |
|      | CROATIA      | -1,8576 * | 0,38285 | 0,000 | -3,2422 | -0,4731 |
|      | HUNGARY      | -2,8131 * | 0,40058 | 0,000 | -4,2617 | -1,3644 |
|      | INDIA        | -0,0788   | 0,35333 | 1,000 | -1,3566 | 1,1989  |
|      | INDONESIA    | -1,9918 * | 0,30387 | 0,000 | -3,0907 | -0,8929 |
|      | IRAQ         | 1,2708    | 0,43820 | 0,344 | -0,3139 | 2,8555  |
|      | ITALY        | -2,9700 * | 0,39193 | 0,000 | -4,3873 | -1,5527 |
|      | JORDAN       | 2,2603 *  | 0,34162 | 0,000 | 1,0249  | 3,4957  |
|      | MALAYSIA     | 6,2943 *  | 0,29832 | 0,000 | 5,2155  | 7,3732  |
|      | NIGERIA      | -1,1165   | 0,56211 | 0,942 | -3,1493 | 0,9162  |
|      | PAKISTAN     | 1,1864    | 0,33659 | 0,067 | -0,0308 | 2,4036  |
|      | ROMANIA      | -1,3698   | 0,38547 | 0,061 | -2,7638 | 0,0241  |
|      | RUSSIA       | 0,8713    | 0,28496 | 0,244 | -0,1592 | 1,9018  |
|      | SAUDI ARABIA | 0,5376    | 0,34741 | 0,997 | -0,7188 | 1,7940  |
|      | TANZANIA     | 3,2939 *  | 0,36284 | 0,000 | 1,9817  | 4,6061  |
|      | TURKEY       | 1,3885 *  | 0,27204 | 0,000 | 0,4047  | 2,3723  |
|      | THAILAND     | 0,8182    | 0,37468 | 0,864 | -0,5368 | 2,1731  |

|       |              |           |         |       |         |         |
|-------|--------------|-----------|---------|-------|---------|---------|
| IRAQ  | USA          | -4,2431 * | 0,32058 | 0,000 | -5,4024 | -3,0837 |
|       | ARMENIA      | -0,6788   | 0,87455 | 1,000 | -3,8414 | 2,4839  |
|       | BELARUS      | -0,4110   | 0,49720 | 1,000 | -2,2091 | 1,3870  |
|       | BRAZIL       | -5,4109 * | 0,40487 | 0,000 | -6,8750 | -3,9467 |
|       | BULGARIA     | -2,0062 * | 0,43399 | 0,001 | -3,5756 | -0,4367 |
|       | CANADA       | 0,0097    | 0,39715 | 1,000 | -1,4266 | 1,4459  |
|       | CROATIA      | -3,1284 * | 0,44677 | 0,000 | -4,7441 | -1,5128 |
|       | HUNGARY      | -4,0839 * | 0,46205 | 0,000 | -5,7548 | -2,4129 |
|       | INDIA        | -1,3496   | 0,42174 | 0,172 | -2,8748 | 0,1755  |
|       | INDONESIA    | -3,2626 * | 0,38126 | 0,000 | -4,6414 | -1,8838 |
|       | IRAN         | -1,2708   | 0,43820 | 0,344 | -2,8555 | 0,3139  |
|       | ITALY        | -4,2408 * | 0,45457 | 0,000 | -5,8847 | -2,5969 |
|       | JORDAN       | 0,9895    | 0,41198 | 0,729 | -0,5003 | 2,4794  |
|       | MALAYSIA     | 5,0235 *  | 0,37686 | 0,000 | 3,6607  | 6,3864  |
|       | NIGERIA      | -2,3874 * | 0,60745 | 0,016 | -4,5841 | -0,1906 |
|       | PAKISTAN     | -0,0844   | 0,40782 | 1,000 | -1,5592 | 1,3904  |
|       | ROMANIA      | -2,6406 * | 0,44901 | 0,000 | -4,2644 | -1,0169 |
|       | RUSSIA       | -0,3995   | 0,36637 | 1,000 | -1,7244 | 0,9254  |
|       | SAUDI ARABIA | -0,7332   | 0,41680 | 0,985 | -2,2405 | 0,7741  |
|       | TANZANIA     | 2,0231 *  | 0,42975 | 0,001 | 0,4690  | 3,5772  |
|       | TURKEY       | 0,1177    | 0,35641 | 1,000 | -1,1712 | 1,4066  |
|       | THAILAND     | -0,4526   | 0,43979 | 1,000 | -2,0431 | 1,1378  |
|       | USA          | -5,5139 * | 0,39471 | 0,000 | -6,9413 | -4,0865 |
| ITALY | ARMENIA      | 3,5620 *  | 0,85230 | 0,006 | 0,4798  | 6,6443  |
|       | BELARUS      | 3,8298 *  | 0,45694 | 0,000 | 2,1773  | 5,4822  |
|       | BRAZIL       | -1,1701   | 0,35428 | 0,130 | -2,4513 | 0,1111  |
|       | BULGARIA     | 2,2346 *  | 0,38722 | 0,000 | 0,8343  | 3,6350  |
|       | CANADA       | 4,2505 *  | 0,34543 | 0,000 | 3,0013  | 5,4997  |
|       | CROATIA      | 1,1124    | 0,40148 | 0,440 | -0,3395 | 2,5643  |
|       | HUNGARY      | 0,1569    | 0,41843 | 1,000 | -1,3563 | 1,6701  |
|       | INDIA        | 2,8912 *  | 0,37344 | 0,000 | 1,5407  | 4,2417  |
|       | INDONESIA    | 0,9782    | 0,32704 | 0,284 | -0,2044 | 2,1609  |



|        |              |           |         |       |         |         |
|--------|--------------|-----------|---------|-------|---------|---------|
|        | IRAN         | 2,9700 *  | 0,39193 | 0,000 | 1,5527  | 4,3873  |
|        | IRAQ         | 4,2408 *  | 0,45457 | 0,000 | 2,5969  | 5,8847  |
|        | JORDAN       | 5,2303 *  | 0,36238 | 0,000 | 3,9198  | 6,5408  |
|        | MALAYSIA     | 9,2643 *  | 0,32189 | 0,000 | 8,1003  | 10,4284 |
|        | NIGERIA      | 1,8535    | 0,57496 | 0,162 | -0,2258 | 3,9327  |
|        | PAKISTAN     | 4,1564 *  | 0,35764 | 0,000 | 2,8631  | 5,4497  |
|        | ROMANIA      | 1,6002 *  | 0,40398 | 0,015 | 0,1392  | 3,0611  |
|        | RUSSIA       | 3,8413 *  | 0,30954 | 0,000 | 2,7219  | 4,9607  |
|        | SAUDI ARABIA | 3,5076 *  | 0,36785 | 0,000 | 2,1773  | 4,8378  |
|        | TANZANIA     | 6,2639 *  | 0,38245 | 0,000 | 4,8808  | 7,6470  |
|        | TURKEY       | 4,3585 *  | 0,29769 | 0,000 | 3,2819  | 5,4350  |
|        | THAILAND     | 3,7882 *  | 0,39370 | 0,000 | 2,3644  | 5,2119  |
|        | USA          | -1,2731 * | 0,34262 | 0,036 | -2,5121 | -0,0340 |
| JORDAN | ARMENIA      | -1,6683   | 0,83037 | 0,936 | -4,6712 | 1,3346  |
|        | BELARUS      | -1,4006   | 0,41460 | 0,105 | -2,8999 | 0,0988  |
|        | BRAZIL       | -6,4004 * | 0,29767 | 0,000 | -7,4769 | -5,3239 |
|        | BULGARIA     | -2,9957 * | 0,33621 | 0,000 | -4,2115 | -1,7799 |
|        | CANADA       | -0,9799   | 0,28708 | 0,095 | -2,0181 | 0,0583  |
|        | CROATIA      | -4,1180 * | 0,35254 | 0,000 | -5,3929 | -2,8431 |
|        | HUNGARY      | -5,0734 * | 0,37172 | 0,000 | -6,4177 | -3,7291 |
|        | INDIA        | -2,3391 * | 0,32023 | 0,000 | -3,4972 | -1,1811 |
|        | INDONESIA    | -4,2521 * | 0,26467 | 0,000 | -5,2092 | -3,2950 |
|        | IRAN         | -2,2603 * | 0,34162 | 0,000 | -3,4957 | -1,0249 |
|        | IRAQ         | -0,9895   | 0,41198 | 0,729 | -2,4794 | 0,5003  |
|        | ITALY        | -5,2303 * | 0,36238 | 0,000 | -6,5408 | -3,9198 |
|        | MALAYSIA     | 4,0340 *  | 0,25828 | 0,000 | 3,1000  | 4,9680  |
|        | NIGERIA      | -3,3769 * | 0,54192 | 0,000 | -5,3366 | -1,4171 |
|        | PAKISTAN     | -1,0739   | 0,30166 | 0,060 | -2,1649 | 0,0170  |
|        | ROMANIA      | -3,6302 * | 0,35538 | 0,000 | -4,9154 | -2,3450 |
|        | RUSSIA       | -1,3890 * | 0,24272 | 0,000 | -2,2667 | -0,5113 |
|        | SAUDI ARABIA | -1,7227 * | 0,31370 | 0,000 | -2,8572 | -0,5883 |

|          |              |           |         |       |          |         |
|----------|--------------|-----------|---------|-------|----------|---------|
|          | TANZANIA     | 1,0336    | 0,33071 | 0,208 | -0,1624  | 2,2295  |
|          | TURKEY       | -,8718*   | 0,22741 | 0,023 | -1,6942  | -0,0495 |
|          | THAILAND     | -1,4422*  | 0,34365 | 0,006 | -2,6849  | -0,1994 |
|          | USA          | -6,5034*  | 0,28369 | 0,000 | -7,5293  | -5,4775 |
| MALAYSIA | ARMENIA      | -5,7023*  | 0,81352 | 0,000 | -8,6442  | -2,7603 |
|          | BELARUS      | -5,4346*  | 0,37972 | 0,000 | -6,8077  | -4,0614 |
|          | BRAZIL       | -10,4344* | 0,24678 | 0,000 | -11,3268 | -9,5420 |
|          | BULGARIA     | -7,0297*  | 0,29211 | 0,000 | -8,0861  | -5,9733 |
|          | CANADA       | -5,0139*  | 0,23390 | 0,000 | -5,8597  | -4,1680 |
|          | CROATIA      | -8,1520*  | 0,31077 | 0,000 | -9,2758  | -7,0281 |
|          | HUNGARY      | -9,1074*  | 0,33237 | 0,000 | -10,3094 | -7,9055 |
|          | INDIA        | -6,3732*  | 0,27357 | 0,000 | -7,3625  | -5,3838 |
|          | INDONESIA    | -8,2861*  | 0,20577 | 0,000 | -9,0302  | -7,5420 |
|          | IRAN         | -6,2943*  | 0,29832 | 0,000 | -7,3732  | -5,2155 |
|          | IRAQ         | -5,0235*  | 0,37686 | 0,000 | -6,3864  | -3,6607 |
|          | ITALY        | -9,2643*  | 0,32189 | 0,000 | -10,4284 | -8,1003 |
|          | JORDAN       | -4,0340*  | 0,25828 | 0,000 | -4,9680  | -3,1000 |
|          | NIGERIA      | -7,4109*  | 0,51572 | 0,000 | -9,2759  | -5,5459 |
|          | PAKISTAN     | -5,1079*  | 0,25158 | 0,000 | -6,0177  | -4,1981 |
|          | ROMANIA      | -7,6642*  | 0,31399 | 0,000 | -8,7997  | -6,5287 |
|          | RUSSIA       | -5,4230*  | 0,17665 | 0,000 | -6,0618  | -4,7842 |
|          | SAUDI ARABIA | -5,7568*  | 0,26589 | 0,000 | -6,7183  | -4,7952 |
|          | TANZANIA     | -3,0004*  | 0,28576 | 0,000 | -4,0338  | -1,9670 |
|          | TURKEY       | -4,9059*  | 0,15494 | 0,000 | -5,4662  | -4,3455 |
|          | THAILAND     | -5,4762*  | 0,30065 | 0,000 | -6,5634  | -4,3889 |
|          | USA          | -10,5374* | 0,22973 | 0,000 | -11,3682 | -9,7066 |
| NIGERIA  | ARMENIA      | 1,7086    | 0,94275 | 0,978 | -1,7007  | 5,1179  |
|          | BELARUS      | 1,9763    | 0,60922 | 0,153 | -0,2268  | 4,1795  |
|          | BRAZIL       | -3,0235*  | 0,53653 | 0,000 | -4,9638  | -1,0832 |
|          | BULGARIA     | 0,3812    | 0,55883 | 1,000 | -1,6397  | 2,4021  |
|          | CANADA       | 2,3970*   | 0,53073 | 0,001 | 0,4777   | 4,3163  |

|          |              |          |         |       |         |         |
|----------|--------------|----------|---------|-------|---------|---------|
|          | CROATIA      | -0,7411  | 0,56881 | 1,000 | -2,7981 | 1,3159  |
|          | HUNGARY      | -1,6965  | 0,58090 | 0,330 | -3,7972 | 0,4042  |
|          | INDIA        | 1,0377   | 0,54937 | 0,966 | -0,9490 | 3,0245  |
|          | INDONESIA    | -0,8752  | 0,51895 | 0,991 | -2,7519 | 1,0015  |
|          | IRAN         | 1,1165   | 0,56211 | 0,942 | -0,9162 | 3,1493  |
|          | IRAQ         | 2,3874*  | 0,60745 | 0,016 | 0,1906  | 4,5841  |
|          | ITALY        | -1,8535  | 0,57496 | 0,162 | -3,9327 | 0,2258  |
|          | JORDAN       | 3,3769*  | 0,54192 | 0,000 | 1,4171  | 5,3366  |
|          | MALAYSIA     | 7,4109*  | 0,51572 | 0,000 | 5,5459  | 9,2759  |
|          | PAKISTAN     | 2,3030*  | 0,53876 | 0,004 | 0,3546  | 4,2513  |
|          | ROMANIA      | -0,2533  | 0,57058 | 1,000 | -2,3167 | 1,8101  |
|          | RUSSIA       | 1,9879*  | 0,50811 | 0,018 | 0,1504  | 3,8254  |
|          | SAUDI ARABIA | 1,6541   | 0,54559 | 0,259 | -0,3189 | 3,6272  |
|          | TANZANIA     | 4,4105*  | 0,55554 | 0,000 | 2,4014  | 6,4195  |
|          | TURKEY       | 2,5050*  | 0,50098 | 0,000 | 0,6933  | 4,3167  |
|          | THAILAND     | 1,9347   | 0,56335 | 0,089 | -0,1025 | 3,9720  |
|          | USA          | -3,1265* | 0,52891 | 0,000 | -5,0392 | -1,2138 |
| PAKISTAN | ARMENIA      | -0,5944  | 0,82831 | 1,000 | -3,5898 | 2,4011  |
|          | BELARUS      | -0,3266  | 0,41046 | 1,000 | -1,8110 | 1,1577  |
|          | BRAZIL       | -5,3265* | 0,29188 | 0,000 | -6,3820 | -4,2709 |
|          | BULGARIA     | -1,9218* | 0,33109 | 0,000 | -3,1191 | -0,7244 |
|          | CANADA       | 0,0941   | 0,28108 | 1,000 | -0,9224 | 1,1105  |
|          | CROATIA      | -3,0440* | 0,34767 | 0,000 | -4,3013 | -1,7868 |
|          | HUNGARY      | -3,9995* | 0,36710 | 0,000 | -5,3270 | -2,6719 |
|          | INDIA        | -1,2652* | 0,31486 | 0,012 | -2,4039 | -0,1266 |
|          | INDONESIA    | -3,1782* | 0,25814 | 0,000 | -4,1117 | -2,2447 |
|          | IRAN         | -1,1864  | 0,33659 | 0,067 | -2,4036 | 0,0308  |
|          | IRAQ         | 0,0844   | 0,40782 | 1,000 | -1,3904 | 1,5592  |
|          | ITALY        | -4,1564* | 0,35764 | 0,000 | -5,4497 | -2,8631 |
|          | JORDAN       | 1,0739   | 0,30166 | 0,060 | -0,0170 | 2,1649  |
|          | MALAYSIA     | 5,1079*  | 0,25158 | 0,000 | 4,1981  | 6,0177  |
|          | NIGERIA      | -2,3030* | 0,53876 | 0,004 | -4,2513 | -0,3546 |

|         |              |           |         |       |         |         |
|---------|--------------|-----------|---------|-------|---------|---------|
|         | ROMANIA      | -2,5562 * | 0,35055 | 0,000 | -3,8240 | -1,2885 |
|         | RUSSIA       | -0,3151   | 0,23558 | 1,000 | -1,1670 | 0,5369  |
|         | SAUDI ARABIA | -0,6488   | 0,30821 | 0,901 | -1,7634 | 0,4658  |
|         | TANZANIA     | 2,1075 *  | 0,32550 | 0,000 | 0,9304  | 3,2846  |
|         | TURKEY       | 0,2021    | 0,21978 | 1,000 | -0,5927 | 0,9969  |
|         | THAILAND     | -0,3682   | 0,33865 | 1,000 | -1,5929 | 0,8564  |
|         | USA          | -5,4295 * | 0,27761 | 0,000 | -6,4334 | -4,4255 |
| ROMANIA | ARMENIA      | 1,9619    | 0,84935 | 0,792 | -1,1097 | 5,0334  |
|         | BELARUS      | 2,2296 *  | 0,45141 | 0,000 | 0,5972  | 3,8621  |
|         | BRAZIL       | -2,7702 * | 0,34712 | 0,000 | -4,0255 | -1,5149 |
|         | BULGARIA     | 0,6345    | 0,38068 | 0,992 | -0,7422 | 2,0112  |
|         | CANADA       | 2,6503 *  | 0,33808 | 0,000 | 1,4277  | 3,8729  |
|         | CROATIA      | -0,4878   | 0,39518 | 1,000 | -1,9169 | 0,9413  |
|         | HUNGARY      | -1,4432   | 0,41239 | 0,073 | -2,9346 | 0,0481  |
|         | INDIA        | 1,2910    | 0,36665 | 0,068 | -0,0349 | 2,6170  |
|         | INDONESIA    | -0,6219   | 0,31927 | 0,953 | -1,7765 | 0,5326  |
|         | IRAN         | 1,3698    | 0,38547 | 0,061 | -0,0241 | 2,7638  |
|         | IRAQ         | 2,6406 *  | 0,44901 | 0,000 | 1,0169  | 4,2644  |
|         | ITALY        | -1,6002 * | 0,40398 | 0,015 | -3,0611 | -0,1392 |
|         | JORDAN       | 3,6302 *  | 0,35538 | 0,000 | 2,3450  | 4,9154  |
|         | MALAYSIA     | 7,6642 *  | 0,31399 | 0,000 | 6,5287  | 8,7997  |
|         | NIGERIA      | 0,2533    | 0,57058 | 1,000 | -1,8101 | 2,3167  |
|         | PAKISTAN     | 2,5562 *  | 0,35055 | 0,000 | 1,2885  | 3,8240  |
|         | RUSSIA       | 2,2412 *  | 0,30132 | 0,000 | 1,1515  | 3,3309  |
|         | SAUDI ARABIA | 1,9074 *  | 0,36096 | 0,000 | 0,6021  | 3,2128  |
|         | TANZANIA     | 4,6638 *  | 0,37583 | 0,000 | 3,3046  | 6,0229  |
|         | TURKEY       | 2,7583 *  | 0,28913 | 0,000 | 1,7127  | 3,8039  |
|         | THAILAND     | 2,1880 *  | 0,38727 | 0,000 | 0,7875  | 3,5885  |
|         | USA          | -2,8732 * | 0,33521 | 0,000 | -4,0855 | -1,6610 |
| RUSSIA  | ARMENIA      | -0,2793   | 0,80871 | 1,000 | -3,2039 | 2,6453  |
|         | BELARUS      | -0,0116   | 0,36931 | 1,000 | -1,3471 | 1,3240  |
|         | BRAZIL       | -5,0114 * | 0,23044 | 0,000 | -5,8448 | -4,1781 |

|                 |              |          |         |       |         |         |
|-----------------|--------------|----------|---------|-------|---------|---------|
|                 | BULGARIA     | -1,6067* | 0,27844 | 0,000 | -2,6136 | -0,5997 |
|                 | CANADA       | 0,4091   | 0,21660 | 0,966 | -0,3742 | 1,1924  |
|                 | CROATIA      | -2,7290* | 0,29796 | 0,000 | -3,8065 | -1,6515 |
|                 | HUNGARY      | -3,6844* | 0,32043 | 0,000 | -4,8432 | -2,5256 |
|                 | INDIA        | -,9501*  | 0,25893 | 0,042 | -1,8865 | -0,0138 |
|                 | INDONESIA    | -2,8631* | 0,18586 | 0,000 | -3,5353 | -2,1910 |
|                 | IRAN         | -0,8713  | 0,28496 | 0,244 | -1,9018 | 0,1592  |
|                 | IRAQ         | 0,3995   | 0,36637 | 1,000 | -0,9254 | 1,7244  |
|                 | ITALY        | -3,8413* | 0,30954 | 0,000 | -4,9607 | -2,7219 |
|                 | JORDAN       | 1,3890*  | 0,24272 | 0,000 | 0,5113  | 2,2667  |
|                 | MALAYSIA     | 5,4230*  | 0,17665 | 0,000 | 4,7842  | 6,0618  |
|                 | NIGERIA      | -1,9879* | 0,50811 | 0,018 | -3,8254 | -0,1504 |
|                 | PAKISTAN     | 0,3151   | 0,23558 | 1,000 | -0,5369 | 1,1670  |
|                 | ROMANIA      | -2,2412* | 0,30132 | 0,000 | -3,3309 | -1,1515 |
|                 | SAUDI ARABIA | -0,3337  | 0,25080 | 1,000 | -1,2407 | 0,5732  |
|                 | TANZANIA     | 2,4226*  | 0,27178 | 0,000 | 1,4397  | 3,4054  |
|                 | TURKEY       | ,5172*   | 0,12733 | 0,010 | 0,0567  | 0,9776  |
|                 | THAILAND     | -0,0532  | 0,28739 | 1,000 | -1,0925 | 0,9861  |
|                 | USA          | -5,1144* | 0,21208 | 0,000 | -5,8814 | -4,3474 |
| SAUDI<br>ARABIA | ARMENIA      | 0,0545   | 0,83277 | 1,000 | -2,9571 | 3,0660  |
|                 | BELARUS      | 0,3222   | 0,41938 | 1,000 | -1,1944 | 1,8388  |
|                 | BRAZIL       | -4,6777* | 0,30430 | 0,000 | -5,7781 | -3,5772 |
|                 | BULGARIA     | -1,2729* | 0,34209 | 0,035 | -2,5101 | -0,0358 |
|                 | CANADA       | 0,7429   | 0,29395 | 0,634 | -0,3202 | 1,8059  |
|                 | CROATIA      | -2,3952* | 0,35816 | 0,000 | -3,6905 | -1,1000 |
|                 | HUNGARY      | -3,3507* | 0,37705 | 0,000 | -4,7142 | -1,9871 |
|                 | INDIA        | -0,6164  | 0,32641 | 0,966 | -1,7968 | 0,5640  |
|                 | INDONESIA    | -2,5294* | 0,27210 | 0,000 | -3,5134 | -1,5454 |
|                 | IRAN         | -0,5376  | 0,34741 | 0,997 | -1,7940 | 0,7188  |
|                 | IRAQ         | 0,7332   | 0,41680 | 0,985 | -0,7741 | 2,2405  |
|                 | ITALY        | -3,5076* | 0,36785 | 0,000 | -4,8378 | -2,1773 |
|                 | JORDAN       | 1,7227*  | 0,31370 | 0,000 | 0,5883  | 2,8572  |

|          |              |           |         |       |         |         |
|----------|--------------|-----------|---------|-------|---------|---------|
|          | MALAYSIA     | 5,7568 *  | 0,26589 | 0,000 | 4,7952  | 6,7183  |
|          | NIGERIA      | -1,6541   | 0,54559 | 0,259 | -3,6272 | 0,3189  |
|          | PAKISTAN     | 0,6488    | 0,30821 | 0,901 | -0,4658 | 1,7634  |
|          | ROMANIA      | -1,9074 * | 0,36096 | 0,000 | -3,2128 | -0,6021 |
|          | RUSSIA       | 0,3337    | 0,25080 | 1,000 | -0,5732 | 1,2407  |
|          | TANZANIA     | 2,7563 *  | 0,33669 | 0,000 | 1,5387  | 3,9739  |
|          | TURKEY       | 0,8509    | 0,23602 | 0,052 | -0,0026 | 1,7044  |
|          | THAILAND     | 0,2806    | 0,34941 | 1,000 | -0,9830 | 1,5442  |
|          | USA          | -4,7807 * | 0,29064 | 0,000 | -5,8317 | -3,7296 |
| TANZANIA | ARMENIA      | -2,7019   | 0,83933 | 0,163 | -5,7371 | 0,3334  |
|          | BELARUS      | -2,4341 * | 0,43225 | 0,000 | -3,9973 | -0,8709 |
|          | BRAZIL       | -7,4340 * | 0,32180 | 0,000 | -8,5977 | -6,2702 |
|          | BULGARIA     | -4,0293 * | 0,35775 | 0,000 | -5,3230 | -2,7355 |
|          | CANADA       | -2,0134 * | 0,31204 | 0,000 | -3,1419 | -0,8850 |
|          | CROATIA      | -5,1516 * | 0,37314 | 0,000 | -6,5010 | -3,8021 |
|          | HUNGARY      | -6,1070 * | 0,39132 | 0,000 | -7,5221 | -4,6918 |
|          | INDIA        | -3,3727 * | 0,34279 | 0,000 | -4,6123 | -2,1331 |
|          | INDONESIA    | -5,2857 * | 0,29155 | 0,000 | -6,3400 | -4,2313 |
|          | IRAN         | -3,2939 * | 0,36284 | 0,000 | -4,6061 | -1,9817 |
|          | IRAQ         | -2,0231 * | 0,42975 | 0,001 | -3,5772 | -0,4690 |
|          | ITALY        | -6,2639 * | 0,38245 | 0,000 | -7,6470 | -4,8808 |
|          | JORDAN       | -1,0336   | 0,33071 | 0,208 | -2,2295 | 0,1624  |
|          | MALAYSIA     | 3,0004 *  | 0,28576 | 0,000 | 1,9670  | 4,0338  |
|          | NIGERIA      | -4,4105 * | 0,55554 | 0,000 | -6,4195 | -2,4014 |
|          | PAKISTAN     | -2,1075 * | 0,32550 | 0,000 | -3,2846 | -0,9304 |
|          | ROMANIA      | -4,6638 * | 0,37583 | 0,000 | -6,0229 | -3,3046 |
|          | RUSSIA       | -2,4226 * | 0,27178 | 0,000 | -3,4054 | -1,4397 |
|          | SAUDI ARABIA | -2,7563 * | 0,33669 | 0,000 | -3,9739 | -1,5387 |
|          | TURKEY       | -1,9054 * | 0,25820 | 0,000 | -2,8392 | -0,9717 |
|          | THAILAND     | -2,4758 * | 0,36476 | 0,000 | -3,7948 | -1,1567 |
|          | USA          | -7,5370 * | 0,30892 | 0,000 | -8,6541 | -6,4198 |

|          |              |          |         |       |         |         |
|----------|--------------|----------|---------|-------|---------|---------|
| TURKEY   | ARMENIA      | -0,7964  | 0,80425 | 1,000 | -3,7049 | 2,1120  |
|          | BELARUS      | -0,5287  | 0,35943 | 0,999 | -1,8285 | 0,7711  |
|          | BRAZIL       | -5,5286* | 0,21426 | 0,000 | -6,3034 | -4,7537 |
|          | BULGARIA     | -2,1238* | 0,26521 | 0,000 | -3,0829 | -1,1648 |
|          | CANADA       | -0,1080  | 0,19929 | 1,000 | -0,8287 | 0,6127  |
|          | CROATIA      | -3,2461* | 0,28563 | 0,000 | -4,2791 | -2,2132 |
|          | HUNGARY      | -4,2016* | 0,30900 | 0,000 | -5,3190 | -3,0841 |
|          | INDIA        | -1,4673* | 0,24464 | 0,000 | -2,3520 | -0,5826 |
|          | INDONESIA    | -3,3803* | 0,16537 | 0,000 | -3,9783 | -2,7822 |
|          | IRAN         | -1,3885* | 0,27204 | 0,000 | -2,3723 | -0,4047 |
|          | IRAQ         | -0,1177  | 0,35641 | 1,000 | -1,4066 | 1,1712  |
|          | ITALY        | -4,3585* | 0,29769 | 0,000 | -5,4350 | -3,2819 |
|          | JORDAN       | ,8718*   | 0,22741 | 0,023 | 0,0495  | 1,6942  |
|          | MALAYSIA     | 4,9059*  | 0,15494 | 0,000 | 4,3455  | 5,4662  |
|          | NIGERIA      | -2,5050* | 0,50098 | 0,000 | -4,3167 | -0,6933 |
|          | PAKISTAN     | -0,2021  | 0,21978 | 1,000 | -0,9969 | 0,5927  |
|          | ROMANIA      | -2,7583* | 0,28913 | 0,000 | -3,8039 | -1,7127 |
|          | RUSSIA       | -,5172*  | 0,12733 | 0,010 | -0,9776 | -0,0567 |
|          | SAUDI ARABIA | -0,8509  | 0,23602 | 0,052 | -1,7044 | 0,0026  |
|          | TANZANIA     | 1,9054*  | 0,25820 | 0,000 | 0,9717  | 2,8392  |
|          | THAILAND     | -0,5703  | 0,27459 | 0,912 | -1,5633 | 0,4227  |
|          | USA          | -5,6316* | 0,19438 | 0,000 | -6,3345 | -4,9286 |
| THAILAND | ARMENIA      | -0,2261  | 0,84451 | 1,000 | -3,2801 | 2,8279  |
|          | BELARUS      | 0,0416   | 0,44224 | 1,000 | -1,5577 | 1,6409  |
|          | BRAZIL       | -4,9582* | 0,33510 | 0,000 | -6,1701 | -3,7464 |
|          | BULGARIA     | -1,5535* | 0,36975 | 0,006 | -2,8907 | -0,2164 |
|          | CANADA       | 0,4623   | 0,32573 | 0,999 | -0,7156 | 1,6403  |
|          | CROATIA      | -2,6758* | 0,38467 | 0,000 | -4,0669 | -1,2847 |
|          | HUNGARY      | -3,6312* | 0,40232 | 0,000 | -5,0862 | -2,1763 |
|          | INDIA        | -0,8970  | 0,35529 | 0,636 | -2,1818 | 0,3879  |
|          | INDONESIA    | -2,8099* | 0,30616 | 0,000 | -3,9171 | -1,7028 |
|          | IRAN         | -0,8182  | 0,37468 | 0,864 | -2,1731 | 0,5368  |

|     |              |          |         |       |         |         |
|-----|--------------|----------|---------|-------|---------|---------|
|     | IRAQ         | 0,4526   | 0,43979 | 1,000 | -1,1378 | 2,0431  |
|     | ITALY        | -3,7882* | 0,39370 | 0,000 | -5,2119 | -2,3644 |
|     | JORDAN       | 1,4422*  | 0,34365 | 0,006 | 0,1994  | 2,6849  |
|     | MALAYSIA     | 5,4762*  | 0,30065 | 0,000 | 4,3889  | 6,5634  |
|     | NIGERIA      | -1,9347  | 0,56335 | 0,089 | -3,9720 | 0,1025  |
|     | PAKISTAN     | 0,3682   | 0,33865 | 1,000 | -0,8564 | 1,5929  |
|     | ROMANIA      | -2,1880* | 0,38727 | 0,000 | -3,5885 | -0,7875 |
|     | RUSSIA       | 0,0532   | 0,28739 | 1,000 | -0,9861 | 1,0925  |
|     | SAUDI ARABIA | -0,2806  | 0,34941 | 1,000 | -1,5442 | 0,9830  |
|     | TANZANIA     | 2,4758*  | 0,36476 | 0,000 | 1,1567  | 3,7948  |
|     | TURKEY       | 0,5703   | 0,27459 | 0,912 | -0,4227 | 1,5633  |
|     | USA          | -5,0612* | 0,32275 | 0,000 | -6,2284 | -3,8941 |
| USA | ARMENIA      | 4,8351*  | 0,82194 | 0,000 | 1,8627  | 7,8075  |
|     | BELARUS      | 5,1029*  | 0,39744 | 0,000 | 3,6656  | 6,5401  |
|     | BRAZIL       | 0,1030   | 0,27327 | 1,000 | -0,8852 | 1,0912  |
|     | BULGARIA     | 3,5077*  | 0,31480 | 0,000 | 2,3693  | 4,6462  |
|     | CANADA       | 5,5235*  | 0,26170 | 0,000 | 4,5771  | 6,4699  |
|     | CROATIA      | 2,3854*  | 0,33219 | 0,000 | 1,1841  | 3,5867  |
|     | HUNGARY      | 1,4300*  | 0,35249 | 0,010 | 0,1553  | 2,7047  |
|     | INDIA        | 4,1643*  | 0,29769 | 0,000 | 3,0877  | 5,2408  |
|     | INDONESIA    | 2,2513*  | 0,23689 | 0,000 | 1,3946  | 3,1080  |
|     | IRAN         | 4,2431*  | 0,32058 | 0,000 | 3,0837  | 5,4024  |
|     | IRAQ         | 5,5139*  | 0,39471 | 0,000 | 4,0865  | 6,9413  |
|     | ITALY        | 1,2731*  | 0,34262 | 0,036 | 0,0340  | 2,5121  |
|     | JORDAN       | 6,5034*  | 0,28369 | 0,000 | 5,4775  | 7,5293  |
|     | MALAYSIA     | 10,5374* | 0,22973 | 0,000 | 9,7066  | 11,3682 |
|     | NIGERIA      | 3,1265*  | 0,52891 | 0,000 | 1,2138  | 5,0392  |
|     | PAKISTAN     | 5,4295*  | 0,27761 | 0,000 | 4,4255  | 6,4334  |
|     | ROMANIA      | 2,8732*  | 0,33521 | 0,000 | 1,6610  | 4,0855  |
|     | RUSSIA       | 5,1144*  | 0,21208 | 0,000 | 4,3474  | 5,8814  |
|     | SAUDI ARABIA | 4,7807*  | 0,29064 | 0,000 | 3,7296  | 5,8317  |



|                   |         |              |          |         |       |         |         |
|-------------------|---------|--------------|----------|---------|-------|---------|---------|
| Personal Distress | ARMENIA | TANZANIA     | 7,5370*  | 0,30892 | 0,000 | 6,4198  | 8,6541  |
|                   |         | TURKEY       | 5,6316*  | 0,19438 | 0,000 | 4,9286  | 6,3345  |
|                   |         | THAILAND     | 5,0612*  | 0,32275 | 0,000 | 3,8941  | 6,2284  |
|                   | ARMENIA | BELARUS      | -0,6488  | 0,86189 | 1,000 | -3,7657 | 2,4680  |
|                   |         | BRAZIL       | -2,4747  | 0,81375 | 0,254 | -5,4175 | 0,4681  |
|                   |         | BULGARIA     | -1,0855  | 0,82816 | 1,000 | -4,0804 | 1,9095  |
|                   |         | CANADA       | -0,7550  | 0,81006 | 1,000 | -3,6844 | 2,1745  |
|                   |         | CROATIA      | -0,3152  | 0,83471 | 1,000 | -3,3338 | 2,7035  |
|                   |         | HUNGARY      | 1,6304   | 0,84274 | 0,956 | -1,4172 | 4,6780  |
|                   |         | INDIA        | 0,2057   | 0,82201 | 1,000 | -2,7669 | 3,1784  |
|                   |         | INDONESIA    | -1,4108  | 0,80263 | 0,985 | -4,3134 | 1,4918  |
|                   |         | IRAN         | -0,3950  | 0,83030 | 1,000 | -3,3977 | 2,6076  |
|                   |         | IRAQ         | 0,3498   | 0,86068 | 1,000 | -2,7627 | 3,4623  |
|                   |         | ITALY        | -0,9614  | 0,83879 | 1,000 | -3,9947 | 2,0719  |
|                   |         | JORDAN       | -0,5862  | 0,81720 | 1,000 | -3,5415 | 2,3691  |
|                   |         | MALAYSIA     | 0,5107   | 0,80061 | 1,000 | -2,3846 | 3,4060  |
|                   |         | NIGERIA      | 0,2417   | 0,92780 | 1,000 | -3,1135 | 3,5969  |
|                   |         | PAKISTAN     | -0,2259  | 0,81518 | 1,000 | -3,1738 | 2,7221  |
|                   |         | ROMANIA      | 2,3722   | 0,83588 | 0,389 | -0,6506 | 5,3951  |
|                   |         | RUSSIA       | 0,4408   | 0,79588 | 1,000 | -2,4374 | 3,3190  |
|                   |         | SAUDI ARABIA | -1,6717  | 0,81956 | 0,925 | -4,6355 | 1,2921  |
|                   |         | TANZANIA     | -0,4330  | 0,82601 | 1,000 | -3,4202 | 2,5541  |
|                   |         | TURKEY       | -2,3226  | 0,79149 | 0,321 | -5,1849 | 0,5397  |
|                   |         | THAILAND     | -0,2412  | 0,83112 | 1,000 | -3,2468 | 2,7644  |
|                   |         | USA          | 2,8075   | 0,80890 | 0,080 | -0,1177 | 5,7328  |
|                   | BELARUS | ARMENIA      | 0,6488   | 0,86189 | 1,000 | -2,4680 | 3,7657  |
|                   |         | BRAZIL       | -1,8258* | 0,40107 | 0,001 | -3,2762 | -0,3754 |
|                   |         | BULGARIA     | -0,4366  | 0,42955 | 1,000 | -1,9900 | 1,1168  |
|                   |         | CANADA       | -0,1061  | 0,39352 | 1,000 | -1,5292 | 1,3170  |
|                   |         | CROATIA      | 0,3337   | 0,44205 | 1,000 | -1,2649 | 1,9323  |
|                   |         | HUNGARY      | 2,2792*  | 0,45702 | 0,000 | 0,6265  | 3,9320  |
|                   |         | INDIA        | 0,8546   | 0,41757 | 0,923 | -0,6555 | 2,3646  |
|                   |         | INDONESIA    | -0,7620  | 0,37800 | 0,933 | -2,1289 | 0,6050  |
|                   |         | IRAN         | 0,2538   | 0,43367 | 1,000 | -1,3145 | 1,8221  |

|        |              |           |         |       |         |         |
|--------|--------------|-----------|---------|-------|---------|---------|
|        | IRAQ         | 0,9986    | 0,48931 | 0,925 | -0,7709 | 2,7682  |
|        | ITALY        | -0,3126   | 0,44969 | 1,000 | -1,9388 | 1,3137  |
|        | JORDAN       | 0,0626    | 0,40802 | 1,000 | -1,4129 | 1,5382  |
|        | MALAYSIA     | 1,1595    | 0,37369 | 0,219 | -0,1919 | 2,5109  |
|        | NIGERIA      | 0,8906    | 0,59956 | 0,998 | -1,2776 | 3,0588  |
|        | PAKISTAN     | 0,4229    | 0,40395 | 1,000 | -1,0379 | 1,8838  |
|        | ROMANIA      | 3,0211 *  | 0,44425 | 0,000 | 1,4145  | 4,6276  |
|        | RUSSIA       | 1,0896    | 0,36345 | 0,280 | -0,2247 | 2,4040  |
|        | SAUDI ARABIA | -1,0229   | 0,41273 | 0,672 | -2,5155 | 0,4697  |
|        | TANZANIA     | 0,2158    | 0,42540 | 1,000 | -1,3226 | 1,7542  |
|        | TURKEY       | -1,6738 * | 0,35373 | 0,001 | -2,9530 | -0,3946 |
|        | THAILAND     | 0,4076    | 0,43522 | 1,000 | -1,1663 | 1,9815  |
|        | USA          | 3,4564 *  | 0,39114 | 0,000 | 2,0419  | 4,8708  |
| BRAZIL | ARMENIA      | 2,4747    | 0,81375 | 0,254 | -0,4681 | 5,4175  |
|        | BELARUS      | 1,8258 *  | 0,40107 | 0,001 | 0,3754  | 3,2762  |
|        | BULGARIA     | 1,3892 *  | 0,32226 | 0,004 | 0,2238  | 2,5546  |
|        | CANADA       | 1,7197 *  | 0,27239 | 0,000 | 0,7346  | 2,7048  |
|        | CROATIA      | 2,1595 *  | 0,33874 | 0,000 | 0,9345  | 3,3845  |
|        | HUNGARY      | 4,1050 *  | 0,35806 | 0,000 | 2,8102  | 5,3999  |
|        | INDIA        | 2,6804 *  | 0,30610 | 0,000 | 1,5734  | 3,7873  |
|        | INDONESIA    | 1,0638 *  | 0,24944 | 0,004 | 0,1618  | 1,9659  |
|        | IRAN         | 2,0796 *  | 0,32773 | 0,000 | 0,8945  | 3,2648  |
|        | IRAQ         | 2,8245 *  | 0,39845 | 0,000 | 1,3835  | 4,2654  |
|        | ITALY        | 1,5133 *  | 0,34866 | 0,003 | 0,2524  | 2,7741  |
|        | JORDAN       | 1,8885 *  | 0,29295 | 0,000 | 0,8291  | 2,9478  |
|        | MALAYSIA     | 2,9854 *  | 0,24286 | 0,000 | 2,1071  | 3,8636  |
|        | NIGERIA      | 2,7164 *  | 0,52802 | 0,000 | 0,8069  | 4,6259  |
|        | PAKISTAN     | 2,2488 *  | 0,28725 | 0,000 | 1,2100  | 3,2876  |
|        | ROMANIA      | 4,8469 *  | 0,34161 | 0,000 | 3,6115  | 6,0823  |
|        | RUSSIA       | 2,9154 *  | 0,22679 | 0,000 | 2,0953  | 3,7356  |
|        | SAUDI ARABIA | 0,8030    | 0,29947 | 0,510 | -0,2800 | 1,8859  |
|        | TANZANIA     | 2,0416 *  | 0,31670 | 0,000 | 0,8963  | 3,1869  |

|          |              |          |         |       |         |         |
|----------|--------------|----------|---------|-------|---------|---------|
|          | TURKEY       | 0,1520   | 0,21086 | 1,000 | -0,6105 | 0,9146  |
|          | THAILAND     | 2,2335*  | 0,32978 | 0,000 | 1,0409  | 3,4261  |
|          | USA          | 5,2822*  | 0,26893 | 0,000 | 4,3096  | 6,2547  |
| BULGARIA | ARMENIA      | 1,0855   | 0,82816 | 1,000 | -1,9095 | 4,0804  |
|          | BELARUS      | 0,4366   | 0,42955 | 1,000 | -1,1168 | 1,9900  |
|          | BRAZIL       | -1,3892* | 0,32226 | 0,004 | -2,5546 | -0,2238 |
|          | CANADA       | 0,3305   | 0,31282 | 1,000 | -0,8008 | 1,4618  |
|          | CROATIA      | 0,7703   | 0,37203 | 0,914 | -0,5751 | 2,1157  |
|          | HUNGARY      | 2,7158*  | 0,38970 | 0,000 | 1,3066  | 4,1251  |
|          | INDIA        | 1,2912*  | 0,34257 | 0,030 | 0,0523  | 2,5300  |
|          | INDONESIA    | -0,3254  | 0,29305 | 1,000 | -1,3851 | 0,7344  |
|          | IRAN         | 0,6904   | 0,36203 | 0,962 | -0,6188 | 1,9996  |
|          | IRAQ         | 1,4352   | 0,42711 | 0,111 | -0,1093 | 2,9798  |
|          | ITALY        | 0,1241   | 0,38108 | 1,000 | -1,2541 | 1,5022  |
|          | JORDAN       | 0,4992   | 0,33087 | 0,998 | -0,6973 | 1,6958  |
|          | MALAYSIA     | 1,5961*  | 0,28747 | 0,000 | 0,5565  | 2,6357  |
|          | NIGERIA      | 1,3272   | 0,54997 | 0,720 | -0,6617 | 3,3160  |
|          | PAKISTAN     | 0,8596   | 0,32584 | 0,545 | -0,3188 | 2,0379  |
|          | ROMANIA      | 3,4577*  | 0,37464 | 0,000 | 2,1028  | 4,8125  |
|          | RUSSIA       | 1,5262*  | 0,27403 | 0,000 | 0,5352  | 2,5172  |
|          | SAUDI ARABIA | -0,5863  | 0,33666 | 0,986 | -1,8038 | 0,6312  |
|          | TANZANIA     | 0,6524   | 0,35208 | 0,972 | -0,6208 | 1,9256  |
|          | TURKEY       | -1,2372* | 0,26100 | 0,001 | -2,1810 | -0,2933 |
|          | THAILAND     | 0,8442   | 0,36389 | 0,785 | -0,4717 | 2,1602  |
|          | USA          | 3,8930*  | 0,30981 | 0,000 | 2,7726  | 5,0134  |
| CANADA   | ARMENIA      | 0,7550   | 0,81006 | 1,000 | -2,1745 | 3,6844  |
|          | BELARUS      | 0,1061   | 0,39352 | 1,000 | -1,3170 | 1,5292  |
|          | BRAZIL       | -1,7197* | 0,27239 | 0,000 | -2,7048 | -0,7346 |
|          | BULGARIA     | -0,3305  | 0,31282 | 1,000 | -1,4618 | 0,8008  |
|          | CROATIA      | 0,4398   | 0,32978 | 1,000 | -0,7528 | 1,6324  |
|          | HUNGARY      | 2,3853*  | 0,34959 | 0,000 | 1,1211  | 3,6496  |
|          | INDIA        | 0,9607   | 0,29615 | 0,153 | -0,1103 | 2,0316  |
|          | INDONESIA    | -0,6559  | 0,23712 | 0,443 | -1,5134 | 0,2016  |

|         |              |          |         |       |         |         |
|---------|--------------|----------|---------|-------|---------|---------|
|         | IRAN         | 0,3599   | 0,31845 | 1,000 | -0,7917 | 1,5115  |
|         | IRAQ         | 1,1048   | 0,39085 | 0,397 | -0,3087 | 2,5182  |
|         | ITALY        | -0,2064  | 0,33995 | 1,000 | -1,4358 | 1,0229  |
|         | JORDAN       | 0,1687   | 0,28253 | 1,000 | -0,8530 | 1,1905  |
|         | MALAYSIA     | 1,2656*  | 0,23019 | 0,000 | 0,4332  | 2,0981  |
|         | NIGERIA      | 0,9967   | 0,52232 | 0,962 | -0,8922 | 2,8855  |
|         | PAKISTAN     | 0,5291   | 0,27662 | 0,961 | -0,4713 | 1,5294  |
|         | ROMANIA      | 3,1272*  | 0,33272 | 0,000 | 1,9240  | 4,3304  |
|         | RUSSIA       | 1,1957*  | 0,21316 | 0,000 | 0,4249  | 1,9666  |
|         | SAUDI ARABIA | -0,9168  | 0,28929 | 0,186 | -1,9629 | 0,1294  |
|         | TANZANIA     | 0,3219   | 0,30709 | 1,000 | -0,7886 | 1,4325  |
|         | TURKEY       | -1,5677* | 0,19613 | 0,000 | -2,2769 | -0,8584 |
|         | THAILAND     | 0,5138   | 0,32056 | 0,995 | -0,6455 | 1,6730  |
|         | USA          | 3,5625*  | 0,25755 | 0,000 | 2,6311  | 4,4939  |
| CROATIA | ARMENIA      | 0,3152   | 0,83471 | 1,000 | -2,7035 | 3,3338  |
|         | BELARUS      | -0,3337  | 0,44205 | 1,000 | -1,9323 | 1,2649  |
|         | BRAZIL       | -2,1595* | 0,33874 | 0,000 | -3,3845 | -0,9345 |
|         | BULGARIA     | -0,7703  | 0,37203 | 0,914 | -2,1157 | 0,5751  |
|         | CANADA       | -0,4398  | 0,32978 | 1,000 | -1,6324 | 0,7528  |
|         | HUNGARY      | 1,9455*  | 0,40343 | 0,000 | 0,4866  | 3,4045  |
|         | INDIA        | 0,5209   | 0,35812 | 0,999 | -0,7742 | 1,8160  |
|         | INDONESIA    | -1,0957  | 0,31108 | 0,068 | -2,2207 | 0,0293  |
|         | IRAN         | -0,0799  | 0,37678 | 1,000 | -1,4424 | 1,2827  |
|         | IRAQ         | 0,6650   | 0,43968 | 0,998 | -0,9251 | 2,2550  |
|         | ITALY        | -0,6462  | 0,39512 | 0,994 | -2,0751 | 0,7826  |
|         | JORDAN       | -0,2711  | 0,34695 | 1,000 | -1,5258 | 0,9836  |
|         | MALAYSIA     | 0,8258   | 0,30584 | 0,495 | -0,2802 | 1,9319  |
|         | NIGERIA      | 0,5569   | 0,55979 | 1,000 | -1,4675 | 2,5813  |
|         | PAKISTAN     | 0,0893   | 0,34215 | 1,000 | -1,1481 | 1,3266  |
|         | ROMANIA      | 2,6874*  | 0,38891 | 0,000 | 1,2809  | 4,0938  |
|         | RUSSIA       | 0,7559   | 0,29324 | 0,593 | -0,3045 | 1,8164  |
|         | SAUDI ARABIA | -1,3566* | 0,35248 | 0,022 | -2,6312 | -0,0819 |
|         | TANZANIA     | -0,1179  | 0,36723 | 1,000 | -1,4459 | 1,2101  |

|         |              |           |         |       |         |         |
|---------|--------------|-----------|---------|-------|---------|---------|
|         | TURKEY       | -2,0075 * | 0,28110 | 0,000 | -3,0240 | -0,9909 |
|         | THAILAND     | 0,0739    | 0,37856 | 1,000 | -1,2951 | 1,4430  |
|         | USA          | 3,1227 *  | 0,32692 | 0,000 | 1,9404  | 4,3049  |
| HUNGARY | ARMENIA      | -1,6304   | 0,84274 | 0,956 | -4,6780 | 1,4172  |
|         | BELARUS      | -2,2792 * | 0,45702 | 0,000 | -3,9320 | -0,6265 |
|         | BRAZIL       | -4,1050 * | 0,35806 | 0,000 | -5,3999 | -2,8102 |
|         | BULGARIA     | -2,7158 * | 0,38970 | 0,000 | -4,1251 | -1,3066 |
|         | CANADA       | -2,3853 * | 0,34959 | 0,000 | -3,6496 | -1,1211 |
|         | CROATIA      | -1,9455 * | 0,40343 | 0,000 | -3,4045 | -0,4866 |
|         | INDIA        | -1,4247 * | 0,37644 | 0,028 | -2,7860 | -0,0633 |
|         | INDONESIA    | -3,0412 * | 0,33201 | 0,000 | -4,2419 | -1,8405 |
|         | IRAN         | -2,0254 * | 0,39423 | 0,000 | -3,4511 | -0,5997 |
|         | IRAQ         | -1,2806   | 0,45472 | 0,405 | -2,9250 | 0,3639  |
|         | ITALY        | -2,5918 * | 0,41179 | 0,000 | -4,0810 | -1,1026 |
|         | JORDAN       | -2,2166 * | 0,36583 | 0,000 | -3,5396 | -0,8936 |
|         | MALAYSIA     | -1,1197   | 0,32710 | 0,092 | -2,3026 | 0,0632  |
|         | NIGERIA      | -1,3887   | 0,57168 | 0,709 | -3,4561 | 0,6787  |
|         | PAKISTAN     | -1,8563 * | 0,36128 | 0,000 | -3,1628 | -0,5498 |
|         | ROMANIA      | 0,7418    | 0,40584 | 0,976 | -0,7258 | 2,2095  |
|         | RUSSIA       | -1,1896 * | 0,31535 | 0,029 | -2,3300 | -0,0492 |
|         | SAUDI ARABIA | -3,3021 * | 0,37107 | 0,000 | -4,6440 | -1,9602 |
|         | TANZANIA     | -2,0634 * | 0,38511 | 0,000 | -3,4561 | -0,6707 |
|         | TURKEY       | -3,9530 * | 0,30410 | 0,000 | -5,0527 | -2,8533 |
|         | THAILAND     | -1,8716 * | 0,39594 | 0,001 | -3,3034 | -0,4397 |
|         | USA          | 1,1771    | 0,34689 | 0,100 | -0,0773 | 2,4316  |
| INDIA   | ARMENIA      | -0,2057   | 0,82201 | 1,000 | -3,1784 | 2,7669  |
|         | BELARUS      | -0,8546   | 0,41757 | 0,923 | -2,3646 | 0,6555  |
|         | BRAZIL       | -2,6804 * | 0,30610 | 0,000 | -3,7873 | -1,5734 |
|         | BULGARIA     | -1,2912 * | 0,34257 | 0,030 | -2,5300 | -0,0523 |
|         | CANADA       | -0,9607   | 0,29615 | 0,153 | -2,0316 | 0,1103  |
|         | CROATIA      | -0,5209   | 0,35812 | 0,999 | -1,8160 | 0,7742  |

|           |              |          |         |       |         |         |
|-----------|--------------|----------|---------|-------|---------|---------|
|           | HUNGARY      | 1,4247*  | 0,37644 | 0,028 | 0,0633  | 2,7860  |
|           | INDONESIA    | -1,6165* | 0,27518 | 0,000 | -2,6117 | -0,6214 |
|           | IRAN         | -0,6007  | 0,34772 | 0,988 | -1,8582 | 0,6567  |
|           | IRAQ         | 0,1441   | 0,41505 | 1,000 | -1,3569 | 1,6450  |
|           | ITALY        | -1,1671  | 0,36751 | 0,183 | -2,4962 | 0,1619  |
|           | JORDAN       | -0,7919  | 0,31516 | 0,645 | -1,9316 | 0,3478  |
|           | MALAYSIA     | 0,3050   | 0,26923 | 1,000 | -0,6687 | 1,2786  |
|           | NIGERIA      | 0,0360   | 0,54066 | 1,000 | -1,9192 | 1,9912  |
|           | PAKISTAN     | -0,4316  | 0,30987 | 0,999 | -1,5522 | 0,6890  |
|           | ROMANIA      | 2,1665*  | 0,36084 | 0,000 | 0,8616  | 3,4714  |
|           | RUSSIA       | 0,2351   | 0,25483 | 1,000 | -0,6865 | 1,1566  |
|           | SAUDI ARABIA | -1,8774* | 0,32123 | 0,000 | -3,0391 | -0,7158 |
|           | TANZANIA     | -0,6388  | 0,33735 | 0,965 | -1,8587 | 0,5812  |
|           | TURKEY       | -2,5283* | 0,24076 | 0,000 | -3,3990 | -1,6577 |
|           | THAILAND     | -0,4469  | 0,34966 | 1,000 | -1,7114 | 0,8176  |
|           | USA          | 2,6018*  | 0,29297 | 0,000 | 1,5424  | 3,6613  |
| INDONESIA | ARMENIA      | 1,4108   | 0,80263 | 0,985 | -1,4918 | 4,3134  |
|           | BELARUS      | 0,7620   | 0,37800 | 0,933 | -0,6050 | 2,1289  |
|           | BRAZIL       | -1,0638* | 0,24944 | 0,004 | -1,9659 | -0,1618 |
|           | BULGARIA     | 0,3254   | 0,29305 | 1,000 | -0,7344 | 1,3851  |
|           | CANADA       | 0,6559   | 0,23712 | 0,443 | -0,2016 | 1,5134  |
|           | CROATIA      | 1,0957   | 0,31108 | 0,068 | -0,0293 | 2,2207  |
|           | HUNGARY      | 3,0412*  | 0,33201 | 0,000 | 1,8405  | 4,2419  |
|           | INDIA        | 1,6165*  | 0,27518 | 0,000 | 0,6214  | 2,6117  |
|           | IRAN         | 1,0158   | 0,29905 | 0,099 | -0,0657 | 2,0973  |
|           | IRAQ         | 1,7606*  | 0,37522 | 0,001 | 0,4037  | 3,1175  |
|           | ITALY        | 0,4494   | 0,32185 | 0,999 | -0,7145 | 1,6133  |
|           | JORDAN       | 0,8246   | 0,26047 | 0,188 | -0,1173 | 1,7665  |
|           | MALAYSIA     | 1,9215*  | 0,20250 | 0,000 | 1,1892  | 2,6538  |
|           | NIGERIA      | 1,6525   | 0,51072 | 0,156 | -0,1944 | 3,4995  |
|           | PAKISTAN     | 1,1849*  | 0,25404 | 0,001 | 0,2662  | 2,1036  |
|           | ROMANIA      | 3,7831*  | 0,31420 | 0,000 | 2,6468  | 4,9193  |

|      |              |          |         |       |         |         |
|------|--------------|----------|---------|-------|---------|---------|
|      | RUSSIA       | 1,8516*  | 0,18291 | 0,000 | 1,1901  | 2,5131  |
|      | SAUDI ARABIA | -0,2609  | 0,26779 | 1,000 | -1,2293 | 0,7075  |
|      | TANZANIA     | 0,9778   | 0,28692 | 0,096 | -0,0598 | 2,0154  |
|      | TURKEY       | -,9118*  | 0,16275 | 0,000 | -1,5004 | -0,3232 |
|      | THAILAND     | 1,1696*  | 0,30130 | 0,020 | 0,0800  | 2,2592  |
|      | USA          | 4,2183*  | 0,23313 | 0,000 | 3,3753  | 5,0614  |
| IRAN | ARMENIA      | 0,3950   | 0,83030 | 1,000 | -2,6076 | 3,3977  |
|      | BELARUS      | -0,2538  | 0,43367 | 1,000 | -1,8221 | 1,3145  |
|      | BRAZIL       | -2,0796* | 0,32773 | 0,000 | -3,2648 | -0,8945 |
|      | BULGARIA     | -0,6904  | 0,36203 | 0,962 | -1,9996 | 0,6188  |
|      | CANADA       | -0,3599  | 0,31845 | 1,000 | -1,5115 | 0,7917  |
|      | CROATIA      | 0,0799   | 0,37678 | 1,000 | -1,2827 | 1,4424  |
|      | HUNGARY      | 2,0254*  | 0,39423 | 0,000 | 0,5997  | 3,4511  |
|      | INDIA        | 0,6007   | 0,34772 | 0,988 | -0,6567 | 1,8582  |
|      | INDONESIA    | -1,0158  | 0,29905 | 0,099 | -2,0973 | 0,0657  |
|      | IRAQ         | 0,7448   | 0,43125 | 0,988 | -0,8147 | 2,3044  |
|      | ITALY        | -0,5664  | 0,38571 | 0,999 | -1,9612 | 0,8285  |
|      | JORDAN       | -0,1912  | 0,33620 | 1,000 | -1,4070 | 1,0246  |
|      | MALAYSIA     | 0,9057   | 0,29359 | 0,229 | -0,1560 | 1,9674  |
|      | NIGERIA      | 0,6368   | 0,55319 | 1,000 | -1,3638 | 2,6373  |
|      | PAKISTAN     | 0,1691   | 0,33125 | 1,000 | -1,0288 | 1,3670  |
|      | ROMANIA      | 2,7673*  | 0,37936 | 0,000 | 1,3954  | 4,1391  |
|      | RUSSIA       | 0,8358   | 0,28044 | 0,291 | -0,1783 | 1,8500  |
|      | SAUDI ARABIA | -1,2767* | 0,34190 | 0,034 | -2,5131 | -0,0403 |
|      | TANZANIA     | -0,0380  | 0,35709 | 1,000 | -1,3294 | 1,2533  |
|      | TURKEY       | -1,9276* | 0,26772 | 0,000 | -2,8958 | -0,9594 |
|      | THAILAND     | 0,1538   | 0,36874 | 1,000 | -1,1797 | 1,4873  |
|      | USA          | 3,2026*  | 0,31549 | 0,000 | 2,0616  | 4,3435  |
| IRAQ | ARMENIA      | -0,3498  | 0,86068 | 1,000 | -3,4623 | 2,7627  |
|      | BELARUS      | -0,9986  | 0,48931 | 0,925 | -2,7682 | 0,7709  |
|      | BRAZIL       | -2,8245* | 0,39845 | 0,000 | -4,2654 | -1,3835 |
|      | BULGARIA     | -1,4352  | 0,42711 | 0,111 | -2,9798 | 0,1093  |
|      | CANADA       | -1,1048  | 0,39085 | 0,397 | -2,5182 | 0,3087  |

|       |              |          |         |       |         |         |
|-------|--------------|----------|---------|-------|---------|---------|
|       | CROATIA      | -0,6650  | 0,43968 | 0,998 | -2,2550 | 0,9251  |
|       | HUNGARY      | 1,2806   | 0,45472 | 0,405 | -0,3639 | 2,9250  |
|       | INDIA        | -0,1441  | 0,41505 | 1,000 | -1,6450 | 1,3569  |
|       | INDONESIA    | -1,7606* | 0,37522 | 0,001 | -3,1175 | -0,4037 |
|       | IRAN         | -0,7448  | 0,43125 | 0,988 | -2,3044 | 0,8147  |
|       | ITALY        | -1,3112  | 0,44736 | 0,323 | -2,9290 | 0,3066  |
|       | JORDAN       | -0,9360  | 0,40545 | 0,792 | -2,4023 | 0,5302  |
|       | MALAYSIA     | 0,1609   | 0,37088 | 1,000 | -1,1803 | 1,5021  |
|       | NIGERIA      | -0,1081  | 0,59781 | 1,000 | -2,2700 | 2,0538  |
|       | PAKISTAN     | -0,5757  | 0,40135 | 0,999 | -2,0271 | 0,8757  |
|       | ROMANIA      | 2,0224*  | 0,44189 | 0,001 | 0,4244  | 3,6205  |
|       | RUSSIA       | 0,0910   | 0,36056 | 1,000 | -1,2129 | 1,3949  |
|       | SAUDI ARABIA | -2,0215* | 0,41019 | 0,000 | -3,5049 | -0,5381 |
|       | TANZANIA     | -0,7828  | 0,42293 | 0,973 | -2,3123 | 0,7466  |
|       | TURKEY       | -2,6724* | 0,35076 | 0,000 | -3,9409 | -1,4040 |
|       | THAILAND     | -0,5910  | 0,43281 | 1,000 | -2,1562 | 0,9742  |
|       | USA          | 2,4577*  | 0,38845 | 0,000 | 1,0530  | 3,8625  |
| ITALY | ARMENIA      | 0,9614   | 0,83879 | 1,000 | -2,0719 | 3,9947  |
|       | BELARUS      | 0,3126   | 0,44969 | 1,000 | -1,3137 | 1,9388  |
|       | BRAZIL       | -1,5133* | 0,34866 | 0,003 | -2,7741 | -0,2524 |
|       | BULGARIA     | -0,1241  | 0,38108 | 1,000 | -1,5022 | 1,2541  |
|       | CANADA       | 0,2064   | 0,33995 | 1,000 | -1,0229 | 1,4358  |
|       | CROATIA      | 0,6462   | 0,39512 | 0,994 | -0,7826 | 2,0751  |
|       | HUNGARY      | 2,5918*  | 0,41179 | 0,000 | 1,1026  | 4,0810  |
|       | INDIA        | 1,1671   | 0,36751 | 0,183 | -0,1619 | 2,4962  |
|       | INDONESIA    | -0,4494  | 0,32185 | 0,999 | -1,6133 | 0,7145  |
|       | IRAN         | 0,5664   | 0,38571 | 0,999 | -0,8285 | 1,9612  |
|       | IRAQ         | 1,3112   | 0,44736 | 0,323 | -0,3066 | 2,9290  |
|       | JORDAN       | 0,3752   | 0,35663 | 1,000 | -0,9145 | 1,6649  |
|       | MALAYSIA     | 1,4721*  | 0,31678 | 0,001 | 0,3265  | 2,6177  |
|       | NIGERIA      | 1,2031   | 0,56584 | 0,892 | -0,8432 | 3,2494  |
|       | PAKISTAN     | 0,7355   | 0,35197 | 0,907 | -0,5373 | 2,0083  |
|       | ROMANIA      | 3,3336*  | 0,39758 | 0,000 | 1,8959  | 4,7714  |



|          |              |           |         |       |         |         |
|----------|--------------|-----------|---------|-------|---------|---------|
|          | RUSSIA       | 1,4022 *  | 0,30463 | 0,001 | 0,3005  | 2,5038  |
|          | SAUDI ARABIA | -0,7103   | 0,36201 | 0,949 | -2,0195 | 0,5988  |
|          | TANZANIA     | 0,5284    | 0,37639 | 0,999 | -0,8328 | 1,8895  |
|          | TURKEY       | -1,3612 * | 0,29297 | 0,001 | -2,4207 | -0,3017 |
|          | THAILAND     | 0,7202    | 0,38746 | 0,971 | -0,6810 | 2,1214  |
|          | USA          | 3,7689 *  | 0,33718 | 0,000 | 2,5496  | 4,9883  |
| JORDAN   | ARMENIA      | 0,5862    | 0,81720 | 1,000 | -2,3691 | 3,5415  |
|          | BELARUS      | -0,0626   | 0,40802 | 1,000 | -1,5382 | 1,4129  |
|          | BRAZIL       | -1,8885 * | 0,29295 | 0,000 | -2,9478 | -0,8291 |
|          | BULGARIA     | -0,4992   | 0,33087 | 0,998 | -1,6958 | 0,6973  |
|          | CANADA       | -0,1687   | 0,28253 | 1,000 | -1,1905 | 0,8530  |
|          | CROATIA      | 0,2711    | 0,34695 | 1,000 | -0,9836 | 1,5258  |
|          | HUNGARY      | 2,2166 *  | 0,36583 | 0,000 | 0,8936  | 3,5396  |
|          | INDIA        | 0,7919    | 0,31516 | 0,645 | -0,3478 | 1,9316  |
|          | INDONESIA    | -0,8246   | 0,26047 | 0,188 | -1,7665 | 0,1173  |
|          | IRAN         | 0,1912    | 0,33620 | 1,000 | -1,0246 | 1,4070  |
|          | IRAQ         | 0,9360    | 0,40545 | 0,792 | -0,5302 | 2,4023  |
|          | ITALY        | -0,3752   | 0,35663 | 1,000 | -1,6649 | 0,9145  |
|          | MALAYSIA     | 1,0969 *  | 0,25418 | 0,003 | 0,1777  | 2,0161  |
|          | NIGERIA      | 0,8279    | 0,53332 | 0,997 | -1,1007 | 2,7566  |
|          | PAKISTAN     | 0,3603    | 0,29688 | 1,000 | -0,7133 | 1,4339  |
|          | ROMANIA      | 2,9584 *  | 0,34975 | 0,000 | 1,6936  | 4,2233  |
|          | RUSSIA       | 1,0270 *  | 0,23887 | 0,004 | 0,1632  | 1,8908  |
|          | SAUDI ARABIA | -1,0855   | 0,30872 | 0,069 | -2,2019 | 0,0309  |
|          | TANZANIA     | 0,1532    | 0,32546 | 1,000 | -1,0238 | 1,3302  |
|          | TURKEY       | -1,7364 * | 0,22380 | 0,000 | -2,5458 | -0,9271 |
|          | THAILAND     | 0,3450    | 0,33820 | 1,000 | -0,8780 | 1,5681  |
|          | USA          | 3,3937 *  | 0,27920 | 0,000 | 2,3841  | 4,4034  |
| MALAYSIA | ARMENIA      | -0,5107   | 0,80061 | 1,000 | -3,4060 | 2,3846  |
|          | BELARUS      | -1,1595   | 0,37369 | 0,219 | -2,5109 | 0,1919  |
|          | BRAZIL       | -2,9854 * | 0,24286 | 0,000 | -3,8636 | -2,1071 |
|          | BULGARIA     | -1,5961 * | 0,28747 | 0,000 | -2,6357 | -0,5565 |
|          | CANADA       | -1,2656 * | 0,23019 | 0,000 | -2,0981 | -0,4332 |

|         |              |          |         |       |         |         |
|---------|--------------|----------|---------|-------|---------|---------|
|         | CROATIA      | -0,8258  | 0,30584 | 0,495 | -1,9319 | 0,2802  |
|         | HUNGARY      | 1,1197   | 0,32710 | 0,092 | -0,0632 | 2,3026  |
|         | INDIA        | -0,3050  | 0,26923 | 1,000 | -1,2786 | 0,6687  |
|         | INDONESIA    | -1,9215* | 0,20250 | 0,000 | -2,6538 | -1,1892 |
|         | IRAN         | -0,9057  | 0,29359 | 0,229 | -1,9674 | 0,1560  |
|         | IRAQ         | -0,1609  | 0,37088 | 1,000 | -1,5021 | 1,1803  |
|         | ITALY        | -1,4721* | 0,31678 | 0,001 | -2,6177 | -0,3265 |
|         | JORDAN       | -1,0969* | 0,25418 | 0,003 | -2,0161 | -0,1777 |
|         | NIGERIA      | -0,2690  | 0,50754 | 1,000 | -2,1044 | 1,5665  |
|         | PAKISTAN     | -0,7366  | 0,24759 | 0,294 | -1,6320 | 0,1588  |
|         | ROMANIA      | 1,8615*  | 0,30901 | 0,000 | 0,7441  | 2,9790  |
|         | RUSSIA       | -0,0699  | 0,17384 | 1,000 | -0,6986 | 0,5588  |
|         | SAUDI ARABIA | -2,1824* | 0,26167 | 0,000 | -3,1287 | -1,2361 |
|         | TANZANIA     | -0,9437  | 0,28123 | 0,112 | -1,9607 | 0,0733  |
|         | TURKEY       | -2,8333* | 0,15249 | 0,000 | -3,3848 | -2,2819 |
|         | THAILAND     | -0,7519  | 0,29588 | 0,622 | -1,8219 | 0,3181  |
|         | USA          | 2,2968*  | 0,22608 | 0,000 | 1,4792  | 3,1144  |
| NIGERIA | ARMENIA      | -0,2417  | 0,92780 | 1,000 | -3,5969 | 3,1135  |
|         | BELARUS      | -0,8906  | 0,59956 | 0,998 | -3,0588 | 1,2776  |
|         | BRAZIL       | -2,7164* | 0,52802 | 0,000 | -4,6259 | -0,8069 |
|         | BULGARIA     | -1,3272  | 0,54997 | 0,720 | -3,3160 | 0,6617  |
|         | CANADA       | -0,9967  | 0,52232 | 0,962 | -2,8855 | 0,8922  |
|         | CROATIA      | -0,5569  | 0,55979 | 1,000 | -2,5813 | 1,4675  |
|         | HUNGARY      | 1,3887   | 0,57168 | 0,709 | -0,6787 | 3,4561  |
|         | INDIA        | -0,0360  | 0,54066 | 1,000 | -1,9912 | 1,9192  |
|         | INDONESIA    | -1,6525  | 0,51072 | 0,156 | -3,4995 | 0,1944  |
|         | IRAN         | -0,6368  | 0,55319 | 1,000 | -2,6373 | 1,3638  |
|         | IRAQ         | 0,1081   | 0,59781 | 1,000 | -2,0538 | 2,2700  |
|         | ITALY        | -1,2031  | 0,56584 | 0,892 | -3,2494 | 0,8432  |
|         | JORDAN       | -0,8279  | 0,53332 | 0,997 | -2,7566 | 1,1007  |
|         | MALAYSIA     | 0,2690   | 0,50754 | 1,000 | -1,5665 | 2,1044  |
|         | PAKISTAN     | -0,4676  | 0,53021 | 1,000 | -2,3850 | 1,4498  |
|         | ROMANIA      | 2,1305*  | 0,56153 | 0,027 | 0,0998  | 4,1612  |

|          |              |           |         |       |         |         |
|----------|--------------|-----------|---------|-------|---------|---------|
|          | RUSSIA       | 0,1991    | 0,50005 | 1,000 | -1,6093 | 2,0074  |
|          | SAUDI ARABIA | -1,9134   | 0,53693 | 0,059 | -3,8552 | 0,0283  |
|          | TANZANIA     | -0,6748   | 0,54673 | 1,000 | -2,6519 | 1,3024  |
|          | TURKEY       | -2,5643 * | 0,49303 | 0,000 | -4,3473 | -0,7814 |
|          | THAILAND     | -0,4829   | 0,55441 | 1,000 | -2,4879 | 1,5220  |
|          | USA          | 2,5658 *  | 0,52052 | 0,000 | 0,6834  | 4,4482  |
| PAKISTAN | ARMENIA      | 0,2259    | 0,81518 | 1,000 | -2,7221 | 3,1738  |
|          | BELARUS      | -0,4229   | 0,40395 | 1,000 | -1,8838 | 1,0379  |
|          | BRAZIL       | -2,2488 * | 0,28725 | 0,000 | -3,2876 | -1,2100 |
|          | BULGARIA     | -0,8596   | 0,32584 | 0,545 | -2,0379 | 0,3188  |
|          | CANADA       | -0,5291   | 0,27662 | 0,961 | -1,5294 | 0,4713  |
|          | CROATIA      | -0,0893   | 0,34215 | 1,000 | -1,3266 | 1,1481  |
|          | HUNGARY      | 1,8563 *  | 0,36128 | 0,000 | 0,5498  | 3,1628  |
|          | INDIA        | 0,4316    | 0,30987 | 0,999 | -0,6890 | 1,5522  |
|          | INDONESIA    | -1,1849 * | 0,25404 | 0,001 | -2,1036 | -0,2662 |
|          | IRAN         | -0,1691   | 0,33125 | 1,000 | -1,3670 | 1,0288  |
|          | IRAQ         | 0,5757    | 0,40135 | 0,999 | -0,8757 | 2,0271  |
|          | ITALY        | -0,7355   | 0,35197 | 0,907 | -2,0083 | 0,5373  |
|          | JORDAN       | -0,3603   | 0,29688 | 1,000 | -1,4339 | 0,7133  |
|          | MALAYSIA     | 0,7366    | 0,24759 | 0,294 | -0,1588 | 1,6320  |
|          | NIGERIA      | 0,4676    | 0,53021 | 1,000 | -1,4498 | 2,3850  |
|          | ROMANIA      | 2,5981 *  | 0,34499 | 0,000 | 1,3505  | 3,8457  |
|          | RUSSIA       | 0,6667    | 0,23184 | 0,362 | -0,1718 | 1,5051  |
|          | SAUDI ARABIA | -1,4458 * | 0,30332 | 0,000 | -2,5427 | -0,3489 |
|          | TANZANIA     | -0,2071   | 0,32034 | 1,000 | -1,3656 | 0,9513  |
|          | TURKEY       | -2,0967 * | 0,21629 | 0,000 | -2,8789 | -1,3145 |
|          | THAILAND     | -0,0153   | 0,33328 | 1,000 | -1,2206 | 1,1899  |
|          | USA          | 3,0334 *  | 0,27321 | 0,000 | 2,0454  | 4,0214  |
| ROMANIA  | ARMENIA      | -2,3722   | 0,83588 | 0,389 | -5,3951 | 0,6506  |
|          | BELARUS      | -3,0211 * | 0,44425 | 0,000 | -4,6276 | -1,4145 |
|          | BRAZIL       | -4,8469 * | 0,34161 | 0,000 | -6,0823 | -3,6115 |
|          | BULGARIA     | -3,4577 * | 0,37464 | 0,000 | -4,8125 | -2,1028 |
|          | CANADA       | -3,1272 * | 0,33272 | 0,000 | -4,3304 | -1,9240 |

|        |              |          |         |       |         |         |
|--------|--------------|----------|---------|-------|---------|---------|
|        | CROATIA      | -2,6874* | 0,38891 | 0,000 | -4,0938 | -1,2809 |
|        | HUNGARY      | -0,7418  | 0,40584 | 0,976 | -2,2095 | 0,7258  |
|        | INDIA        | -2,1665* | 0,36084 | 0,000 | -3,4714 | -0,8616 |
|        | INDONESIA    | -3,7831* | 0,31420 | 0,000 | -4,9193 | -2,6468 |
|        | IRAN         | -2,7673* | 0,37936 | 0,000 | -4,1391 | -1,3954 |
|        | IRAQ         | -2,0224* | 0,44189 | 0,001 | -3,6205 | -0,4244 |
|        | ITALY        | -3,3336* | 0,39758 | 0,000 | -4,7714 | -1,8959 |
|        | JORDAN       | -2,9584* | 0,34975 | 0,000 | -4,2233 | -1,6936 |
|        | MALAYSIA     | -1,8615* | 0,30901 | 0,000 | -2,9790 | -0,7441 |
|        | NIGERIA      | -2,1305* | 0,56153 | 0,027 | -4,1612 | -0,0998 |
|        | PAKISTAN     | -2,5981* | 0,34499 | 0,000 | -3,8457 | -1,3505 |
|        | RUSSIA       | -1,9315* | 0,29654 | 0,000 | -3,0039 | -0,8591 |
|        | SAUDI ARABIA | -4,0439* | 0,35523 | 0,000 | -5,3286 | -2,7593 |
|        | TANZANIA     | -2,8053* | 0,36987 | 0,000 | -4,1428 | -1,4677 |
|        | TURKEY       | -4,6949* | 0,28455 | 0,000 | -5,7239 | -3,6658 |
|        | THAILAND     | -2,6134* | 0,38113 | 0,000 | -3,9917 | -1,2351 |
|        | USA          | 0,4353   | 0,32989 | 1,000 | -0,7577 | 1,6283  |
| RUSSIA | ARMENIA      | -0,4408  | 0,79588 | 1,000 | -3,3190 | 2,4374  |
|        | BELARUS      | -1,0896  | 0,36345 | 0,280 | -2,4040 | 0,2247  |
|        | BRAZIL       | -2,9154* | 0,22679 | 0,000 | -3,7356 | -2,0953 |
|        | BULGARIA     | -1,5262* | 0,27403 | 0,000 | -2,5172 | -0,5352 |
|        | CANADA       | -1,1957* | 0,21316 | 0,000 | -1,9666 | -0,4249 |
|        | CROATIA      | -0,7559  | 0,29324 | 0,593 | -1,8164 | 0,3045  |
|        | HUNGARY      | 1,1896*  | 0,31535 | 0,029 | 0,0492  | 2,3300  |
|        | INDIA        | -0,2351  | 0,25483 | 1,000 | -1,1566 | 0,6865  |
|        | INDONESIA    | -1,8516* | 0,18291 | 0,000 | -2,5131 | -1,1901 |
|        | IRAN         | -0,8358  | 0,28044 | 0,291 | -1,8500 | 0,1783  |
|        | IRAQ         | -0,0910  | 0,36056 | 1,000 | -1,3949 | 1,2129  |
|        | ITALY        | -1,4022* | 0,30463 | 0,001 | -2,5038 | -0,3005 |
|        | JORDAN       | -1,0270* | 0,23887 | 0,004 | -1,8908 | -0,1632 |
|        | MALAYSIA     | 0,0699   | 0,17384 | 1,000 | -0,5588 | 0,6986  |

|              |              |          |         |       |         |         |
|--------------|--------------|----------|---------|-------|---------|---------|
|              | NIGERIA      | -0,1991  | 0,50005 | 1,000 | -2,0074 | 1,6093  |
|              | PAKISTAN     | -0,6667  | 0,23184 | 0,362 | -1,5051 | 0,1718  |
|              | ROMANIA      | 1,9315*  | 0,29654 | 0,000 | 0,8591  | 3,0039  |
|              | SAUDI ARABIA | -2,1125* | 0,24683 | 0,000 | -3,0051 | -1,2199 |
|              | TANZANIA     | -0,8738  | 0,26747 | 0,144 | -1,8411 | 0,0934  |
|              | TURKEY       | -2,7634* | 0,12531 | 0,000 | -3,2165 | -2,3102 |
|              | THAILAND     | -0,6820  | 0,28283 | 0,722 | -1,7048 | 0,3408  |
|              | USA          | 2,3668*  | 0,20872 | 0,000 | 1,6120  | 3,1216  |
| SAUDI ARABIA | ARMENIA      | 1,6717   | 0,81956 | 0,925 | -1,2921 | 4,6355  |
|              | BELARUS      | 1,0229   | 0,41273 | 0,672 | -0,4697 | 2,5155  |
|              | BRAZIL       | -0,8030  | 0,29947 | 0,510 | -1,8859 | 0,2800  |
|              | BULGARIA     | 0,5863   | 0,33666 | 0,986 | -0,6312 | 1,8038  |
|              | CANADA       | 0,9168   | 0,28929 | 0,186 | -0,1294 | 1,9629  |
|              | CROATIA      | 1,3566*  | 0,35248 | 0,022 | 0,0819  | 2,6312  |
|              | HUNGARY      | 3,3021*  | 0,37107 | 0,000 | 1,9602  | 4,6440  |
|              | INDIA        | 1,8774*  | 0,32123 | 0,000 | 0,7158  | 3,0391  |
|              | INDONESIA    | 0,2609   | 0,26779 | 1,000 | -0,7075 | 1,2293  |
|              | IRAN         | 1,2767*  | 0,34190 | 0,034 | 0,0403  | 2,5131  |
|              | IRAQ         | 2,0215*  | 0,41019 | 0,000 | 0,5381  | 3,5049  |
|              | ITALY        | 0,7103   | 0,36201 | 0,949 | -0,5988 | 2,0195  |
|              | JORDAN       | 1,0855   | 0,30872 | 0,069 | -0,0309 | 2,2019  |
|              | MALAYSIA     | 2,1824*  | 0,26167 | 0,000 | 1,2361  | 3,1287  |
|              | NIGERIA      | 1,9134   | 0,53693 | 0,059 | -0,0283 | 3,8552  |
|              | PAKISTAN     | 1,4458*  | 0,30332 | 0,000 | 0,3489  | 2,5427  |
|              | ROMANIA      | 4,0439*  | 0,35523 | 0,000 | 2,7593  | 5,3286  |
|              | RUSSIA       | 2,1125*  | 0,24683 | 0,000 | 1,2199  | 3,0051  |
|              | TANZANIA     | 1,2387*  | 0,33135 | 0,033 | 0,0404  | 2,4369  |
|              | TURKEY       | -0,6509  | 0,23228 | 0,416 | -1,4909 | 0,1891  |
|              | THAILAND     | 1,4305*  | 0,34387 | 0,007 | 0,1870  | 2,6741  |
|              | USA          | 4,4792*  | 0,28603 | 0,000 | 3,4448  | 5,5136  |
| TANZANIA     | ARMENIA      | 0,4330   | 0,82601 | 1,000 | -2,5541 | 3,4202  |
|              | BELARUS      | -0,2158  | 0,42540 | 1,000 | -1,7542 | 1,3226  |

|        |              |          |         |       |         |         |
|--------|--------------|----------|---------|-------|---------|---------|
|        | BRAZIL       | -2,0416* | 0,31670 | 0,000 | -3,1869 | -0,8963 |
|        | BULGARIA     | -0,6524  | 0,35208 | 0,972 | -1,9256 | 0,6208  |
|        | CANADA       | -0,3219  | 0,30709 | 1,000 | -1,4325 | 0,7886  |
|        | CROATIA      | 0,1179   | 0,36723 | 1,000 | -1,2101 | 1,4459  |
|        | HUNGARY      | 2,0634*  | 0,38511 | 0,000 | 0,6707  | 3,4561  |
|        | INDIA        | 0,6388   | 0,33735 | 0,965 | -0,5812 | 1,8587  |
|        | INDONESIA    | -0,9778  | 0,28692 | 0,096 | -2,0154 | 0,0598  |
|        | IRAN         | 0,0380   | 0,35709 | 1,000 | -1,2533 | 1,3294  |
|        | IRAQ         | 0,7828   | 0,42293 | 0,973 | -0,7466 | 2,3123  |
|        | ITALY        | -0,5284  | 0,37639 | 0,999 | -1,8895 | 0,8328  |
|        | JORDAN       | -0,1532  | 0,32546 | 1,000 | -1,3302 | 1,0238  |
|        | MALAYSIA     | 0,9437   | 0,28123 | 0,112 | -0,0733 | 1,9607  |
|        | NIGERIA      | 0,6748   | 0,54673 | 1,000 | -1,3024 | 2,6519  |
|        | PAKISTAN     | 0,2071   | 0,32034 | 1,000 | -0,9513 | 1,3656  |
|        | ROMANIA      | 2,8053*  | 0,36987 | 0,000 | 1,4677  | 4,1428  |
|        | RUSSIA       | 0,8738   | 0,26747 | 0,144 | -0,0934 | 1,8411  |
|        | SAUDI ARABIA | -1,2387* | 0,33135 | 0,033 | -2,4369 | -0,0404 |
|        | TURKEY       | -1,8896* | 0,25410 | 0,000 | -2,8085 | -0,9707 |
|        | THAILAND     | 0,1918   | 0,35897 | 1,000 | -1,1063 | 1,4900  |
|        | USA          | 3,2406*  | 0,30402 | 0,000 | 2,1411  | 4,3400  |
| TURKEY | ARMENIA      | 2,3226   | 0,79149 | 0,321 | -0,5397 | 5,1849  |
|        | BELARUS      | 1,6738*  | 0,35373 | 0,001 | 0,3946  | 2,9530  |
|        | BRAZIL       | -0,1520  | 0,21086 | 1,000 | -0,9146 | 0,6105  |
|        | BULGARIA     | 1,2372*  | 0,26100 | 0,001 | 0,2933  | 2,1810  |
|        | CANADA       | 1,5677*  | 0,19613 | 0,000 | 0,8584  | 2,2769  |
|        | CROATIA      | 2,0075*  | 0,28110 | 0,000 | 0,9909  | 3,0240  |
|        | HUNGARY      | 3,9530*  | 0,30410 | 0,000 | 2,8533  | 5,0527  |
|        | INDIA        | 2,5283*  | 0,24076 | 0,000 | 1,6577  | 3,3990  |
|        | INDONESIA    | ,9118*   | 0,16275 | 0,000 | 0,3232  | 1,5004  |
|        | IRAN         | 1,9276*  | 0,26772 | 0,000 | 0,9594  | 2,8958  |
|        | IRAQ         | 2,6724*  | 0,35076 | 0,000 | 1,4040  | 3,9409  |
|        | ITALY        | 1,3612*  | 0,29297 | 0,001 | 0,3017  | 2,4207  |

|          |              |           |         |       |         |         |
|----------|--------------|-----------|---------|-------|---------|---------|
|          | JORDAN       | 1,7364 *  | 0,22380 | 0,000 | 0,9271  | 2,5458  |
|          | MALAYSIA     | 2,8333 *  | 0,15249 | 0,000 | 2,2819  | 3,3848  |
|          | NIGERIA      | 2,5643 *  | 0,49303 | 0,000 | 0,7814  | 4,3473  |
|          | PAKISTAN     | 2,0967 *  | 0,21629 | 0,000 | 1,3145  | 2,8789  |
|          | ROMANIA      | 4,6949 *  | 0,28455 | 0,000 | 3,6658  | 5,7239  |
|          | RUSSIA       | 2,7634 *  | 0,12531 | 0,000 | 2,3102  | 3,2165  |
|          | SAUDI ARABIA | 0,6509    | 0,23228 | 0,416 | -0,1891 | 1,4909  |
|          | TANZANIA     | 1,8896 *  | 0,25410 | 0,000 | 0,9707  | 2,8085  |
|          | THAILAND     | 2,0814 *  | 0,27023 | 0,000 | 1,1042  | 3,0587  |
|          | USA          | 5,1301 *  | 0,19130 | 0,000 | 4,4384  | 5,8219  |
| THAILAND | ARMENIA      | 0,2412    | 0,83112 | 1,000 | -2,7644 | 3,2468  |
|          | BELARUS      | -0,4076   | 0,43522 | 1,000 | -1,9815 | 1,1663  |
|          | BRAZIL       | -2,2335 * | 0,32978 | 0,000 | -3,4261 | -1,0409 |
|          | BULGARIA     | -0,8442   | 0,36389 | 0,785 | -2,1602 | 0,4717  |
|          | CANADA       | -0,5138   | 0,32056 | 0,995 | -1,6730 | 0,6455  |
|          | CROATIA      | -0,0739   | 0,37856 | 1,000 | -1,4430 | 1,2951  |
|          | HUNGARY      | 1,8716 *  | 0,39594 | 0,001 | 0,4397  | 3,3034  |
|          | INDIA        | 0,4469    | 0,34966 | 1,000 | -0,8176 | 1,7114  |
|          | INDONESIA    | -1,1696 * | 0,30130 | 0,020 | -2,2592 | -0,0800 |
|          | IRAN         | -0,1538   | 0,36874 | 1,000 | -1,4873 | 1,1797  |
|          | IRAQ         | 0,5910    | 0,43281 | 1,000 | -0,9742 | 2,1562  |
|          | ITALY        | -0,7202   | 0,38746 | 0,971 | -2,1214 | 0,6810  |
|          | JORDAN       | -0,3450   | 0,33820 | 1,000 | -1,5681 | 0,8780  |
|          | MALAYSIA     | 0,7519    | 0,29588 | 0,622 | -0,3181 | 1,8219  |
|          | NIGERIA      | 0,4829    | 0,55441 | 1,000 | -1,5220 | 2,4879  |
|          | PAKISTAN     | 0,0153    | 0,33328 | 1,000 | -1,1899 | 1,2206  |
|          | ROMANIA      | 2,6134 *  | 0,38113 | 0,000 | 1,2351  | 3,9917  |
|          | RUSSIA       | 0,6820    | 0,28283 | 0,722 | -0,3408 | 1,7048  |
|          | SAUDI ARABIA | -1,4305 * | 0,34387 | 0,007 | -2,6741 | -0,1870 |
|          | TANZANIA     | -0,1918   | 0,35897 | 1,000 | -1,4900 | 1,1063  |
|          | TURKEY       | -2,0814 * | 0,27023 | 0,000 | -3,0587 | -1,1042 |
|          | USA          | 3,0487 *  | 0,31763 | 0,000 | 1,9001  | 4,1974  |

|     |              |          |         |       |         |         |
|-----|--------------|----------|---------|-------|---------|---------|
| USA | ARMENIA      | -2,8075  | 0,80890 | 0,080 | -5,7328 | 0,1177  |
|     | BELARUS      | -3,4564* | 0,39114 | 0,000 | -4,8708 | -2,0419 |
|     | BRAZIL       | -5,2822* | 0,26893 | 0,000 | -6,2547 | -4,3096 |
|     | BULGARIA     | -3,8930* | 0,30981 | 0,000 | -5,0134 | -2,7726 |
|     | CANADA       | -3,5625* | 0,25755 | 0,000 | -4,4939 | -2,6311 |
|     | CROATIA      | -3,1227* | 0,32692 | 0,000 | -4,3049 | -1,9404 |
|     | HUNGARY      | -1,1771  | 0,34689 | 0,100 | -2,4316 | 0,0773  |
|     | INDIA        | -2,6018* | 0,29297 | 0,000 | -3,6613 | -1,5424 |
|     | INDONESIA    | -4,2183* | 0,23313 | 0,000 | -5,0614 | -3,3753 |
|     | IRAN         | -3,2026* | 0,31549 | 0,000 | -4,3435 | -2,0616 |
|     | IRAQ         | -2,4577* | 0,38845 | 0,000 | -3,8625 | -1,0530 |
|     | ITALY        | -3,7689* | 0,33718 | 0,000 | -4,9883 | -2,5496 |
|     | JORDAN       | -3,3937* | 0,27920 | 0,000 | -4,4034 | -2,3841 |
|     | MALAYSIA     | -2,2968* | 0,22608 | 0,000 | -3,1144 | -1,4792 |
|     | NIGERIA      | -2,5658* | 0,52052 | 0,000 | -4,4482 | -0,6834 |
|     | PAKISTAN     | -3,0334* | 0,27321 | 0,000 | -4,0214 | -2,0454 |
|     | ROMANIA      | -0,4353  | 0,32989 | 1,000 | -1,6283 | 0,7577  |
|     | RUSSIA       | -2,3668* | 0,20872 | 0,000 | -3,1216 | -1,6120 |
|     | SAUDI ARABIA | -4,4792* | 0,28603 | 0,000 | -5,5136 | -3,4448 |
|     | TANZANIA     | -3,2406* | 0,30402 | 0,000 | -4,3400 | -2,1411 |
|     | TURKEY       | -5,1301* | 0,19130 | 0,000 | -5,8219 | -4,4384 |
|     | THAILAND     | -3,0487* | 0,31763 | 0,000 | -4,1974 | -1,9001 |

Based on observed means.

The error term is Mean Square(Error) = 20,529.

\*. The mean difference is significant at the ,05 level.



**Table S2: Results of Tukey's post hoc tests analyses with IRI subscales as outcome variables, and religion.**

| Dependent Variable |          |                                      | Mean<br>Difference (I-J) | Std. Error | Sig.  | 95% Confidence Interval |         |
|--------------------|----------|--------------------------------------|--------------------------|------------|-------|-------------------------|---------|
| Perspective-Taking | Agnostic | Hindu                                | 1,3299 <sup>*</sup>      | 0,22448    | 0,000 | 0,6679                  | 1,9918  |
|                    |          | Buddhist                             | 2,7168 <sup>*</sup>      | 0,24989    | 0,000 | 1,9799                  | 3,4537  |
|                    |          | Judaist                              | -0,1911                  | 0,72314    | 1,000 | -2,3234                 | 1,9413  |
|                    |          | Christian                            | 0,2881                   | 0,12371    | 0,230 | -0,0767                 | 0,6529  |
|                    |          | Islamic                              | 1,4307 <sup>*</sup>      | 0,10931    | 0,000 | 1,1084                  | 1,7530  |
|                    |          | follower of tradition local religion | -1,1760 <sup>*</sup>     | 0,32804    | 0,006 | -2,1433                 | -0,2087 |
|                    |          |                                      |                          |            |       |                         |         |
|                    |          |                                      |                          |            |       |                         |         |
|                    | Hindu    | Agnostic                             | -1,3299 <sup>*</sup>     | 0,22448    | 0,000 | -1,9918                 | -0,6679 |
|                    |          | Buddhist                             | 1,3869 <sup>*</sup>      | 0,30606    | 0,000 | 0,4844                  | 2,2894  |
|                    |          | Judaist                              | -1,5209                  | 0,74442    | 0,387 | -3,7160                 | 0,6742  |
|                    |          | Christian                            | -1,0418 <sup>*</sup>     | 0,21572    | 0,000 | -1,6778                 | -0,4057 |
|                    |          | Islamic                              | 0,1008                   | 0,20779    | 0,999 | -0,5119                 | 0,7136  |
|                    |          | follower of tradition local religion | -2,5058 <sup>*</sup>     | 0,37261    | 0,000 | -3,6046                 | -1,4071 |
|                    | Buddhist | Agnostic                             | -2,7168 <sup>*</sup>     | 0,24989    | 0,000 | -3,4537                 | -1,9799 |
|                    |          | Hindu                                | -1,3869 <sup>*</sup>     | 0,30606    | 0,000 | -2,2894                 | -0,4844 |
|                    |          | Judaist                              | -2,9079 <sup>*</sup>     | 0,75247    | 0,002 | -5,1267                 | -0,6890 |
|                    |          | Christian                            | -2,4287 <sup>*</sup>     | 0,24205    | 0,000 | -3,1424                 | -1,7149 |
|                    |          | Islamic                              | -1,2861 <sup>*</sup>     | 0,23502    | 0,000 | -1,9791                 | -0,5931 |
|                    |          | follower of tradition local religion | -3,8928 <sup>*</sup>     | 0,38845    | 0,000 | -5,0382                 | -2,7474 |
|                    | Judaist  | Agnostic                             | 0,1911                   | 0,72314    | 1,000 | -1,9413                 | 2,3234  |
|                    |          | Hindu                                | 1,5209                   | 0,74442    | 0,387 | -0,6742                 | 3,7160  |
|                    |          | Buddhist                             | 2,9079 <sup>*</sup>      | 0,75247    | 0,002 | 0,6890                  | 5,1267  |
|                    |          | Christian                            | 0,4792                   | 0,72047    | 0,994 | -1,6453                 | 2,6036  |

|                                      |                                      |                                      |          |         |         |         |         |
|--------------------------------------|--------------------------------------|--------------------------------------|----------|---------|---------|---------|---------|
|                                      |                                      | Islamic                              | 1,6218   | 0,71813 | 0,265   | -0,4958 | 3,7393  |
|                                      |                                      | follower of tradition local religion | -0,9849  | 0,78190 | 0,870   | -3,2905 | 1,3207  |
| Christian                            | Agnostic                             | -0,2881                              | 0,12371  | 0,230   | -0,6529 | 0,0767  |         |
|                                      | Hindu                                | 1,0418*                              | 0,21572  | 0,000   | 0,4057  | 1,6778  |         |
|                                      | Buddhist                             | 2,4287*                              | 0,24205  | 0,000   | 1,7149  | 3,1424  |         |
|                                      | Judaist                              | -0,4792                              | 0,72047  | 0,994   | -2,6036 | 1,6453  |         |
|                                      | Islamic                              | 1,1426*                              | 0,08995  | 0,000   | 0,8773  | 1,4078  |         |
|                                      | follower of tradition local religion | -1,4641*                             | 0,32210  | 0,000   | -2,4139 | -0,5143 |         |
| Islamic                              | Agnostic                             | -1,4307*                             | 0,10931  | 0,000   | -1,7530 | -1,1084 |         |
|                                      | Hindu                                | -0,1008                              | 0,20779  | 0,999   | -0,7136 | 0,5119  |         |
|                                      | Buddhist                             | 1,2861*                              | 0,23502  | 0,000   | 0,5931  | 1,9791  |         |
|                                      | Judaist                              | -1,6218                              | 0,71813  | 0,265   | -3,7393 | 0,4958  |         |
|                                      | Christian                            | -1,1426*                             | 0,08995  | 0,000   | -1,4078 | -0,8773 |         |
|                                      | follower of tradition local religion | -2,6067*                             | 0,31685  | 0,000   | -3,5410 | -1,6724 |         |
| follower of tradition local religion | Agnostic                             | 1,1760*                              | 0,32804  | 0,006   | 0,2087  | 2,1433  |         |
|                                      | Hindu                                | 2,5058*                              | 0,37261  | 0,000   | 1,4071  | 3,6046  |         |
|                                      | Buddhist                             | 3,8928*                              | 0,38845  | 0,000   | 2,7474  | 5,0382  |         |
|                                      | Judaist                              | 0,9849                               | 0,78190  | 0,870   | -1,3207 | 3,2905  |         |
|                                      | Christian                            | 1,4641*                              | 0,32210  | 0,000   | 0,5143  | 2,4139  |         |
|                                      | Islamic                              | 2,6067*                              | 0,31685  | 0,000   | 1,6724  | 3,5410  |         |
| Empathic Concern                     | Agnostic                             | Hindu                                | ,7163*   | 0,23400 | 0,036   | 0,0263  | 1,4063  |
|                                      |                                      | Buddhist                             | 2,2798*  | 0,26049 | 0,000   | 1,5117  | 3,0479  |
|                                      |                                      | Judaist                              | -2,6851* | 0,75379 | 0,007   | -4,9079 | -0,4624 |
|                                      |                                      | Christian                            | -,6093*  | 0,12896 | 0,000   | -0,9896 | -0,2290 |
|                                      |                                      | Islamic                              | 1,4655*  | 0,11395 | 0,000   | 1,1295  | 1,8015  |
|                                      |                                      | follower of tradition local religion | -1,7621* | 0,34194 | 0,000   | -2,7704 | -0,7538 |

|           |                                      |                      |         |       |         |         |
|-----------|--------------------------------------|----------------------|---------|-------|---------|---------|
| Hindu     | Agnostic                             | -,7163 <sup>*</sup>  | 0,23400 | 0,036 | -1,4063 | -0,0263 |
|           | Buddhist                             | 1,5635 <sup>*</sup>  | 0,31904 | 0,000 | 0,6227  | 2,5042  |
|           | Judaist                              | -3,4015 <sup>*</sup> | 0,77598 | 0,000 | -5,6896 | -1,1133 |
|           | Christian                            | -1,3256 <sup>*</sup> | 0,22486 | 0,000 | -1,9887 | -0,6626 |
|           | Islamic                              | ,7492 <sup>*</sup>   | 0,21660 | 0,010 | 0,1105  | 1,3879  |
|           | follower of tradition local religion | -2,4784 <sup>*</sup> | 0,38840 | 0,000 | -3,6237 | -1,3331 |
| Buddhist  | Agnostic                             | -2,2798 <sup>*</sup> | 0,26049 | 0,000 | -3,0479 | -1,5117 |
|           | Hindu                                | -1,5635 <sup>*</sup> | 0,31904 | 0,000 | -2,5042 | -0,6227 |
|           | Judaist                              | -4,9649 <sup>*</sup> | 0,78437 | 0,000 | -7,2778 | -2,6520 |
|           | Christian                            | -2,8891 <sup>*</sup> | 0,25231 | 0,000 | -3,6331 | -2,1451 |
|           | Islamic                              | -,8143 <sup>*</sup>  | 0,24498 | 0,016 | -1,5367 | -0,0919 |
|           | follower of tradition local religion | -4,0419 <sup>*</sup> | 0,40492 | 0,000 | -5,2359 | -2,8479 |
| Judaist   | Agnostic                             | 2,6851 <sup>*</sup>  | 0,75379 | 0,007 | 0,4624  | 4,9079  |
|           | Hindu                                | 3,4015 <sup>*</sup>  | 0,77598 | 0,000 | 1,1133  | 5,6896  |
|           | Buddhist                             | 4,9649 <sup>*</sup>  | 0,78437 | 0,000 | 2,6520  | 7,2778  |
|           | Christian                            | 2,0758               | 0,75101 | 0,083 | -0,1387 | 4,2904  |
|           | Islamic                              | 4,1506 <sup>*</sup>  | 0,74858 | 0,000 | 1,9433  | 6,3580  |
|           | follower of tradition local religion | 0,9230               | 0,81505 | 0,918 | -1,4803 | 3,3264  |
| Christian | Agnostic                             | ,6093 <sup>*</sup>   | 0,12896 | 0,000 | 0,2290  | 0,9896  |
|           | Hindu                                | 1,3256 <sup>*</sup>  | 0,22486 | 0,000 | 0,6626  | 1,9887  |
|           | Buddhist                             | 2,8891 <sup>*</sup>  | 0,25231 | 0,000 | 2,1451  | 3,6331  |
|           | Judaist                              | -2,0758              | 0,75101 | 0,083 | -4,2904 | 0,1387  |
|           | Islamic                              | 2,0748 <sup>*</sup>  | 0,09377 | 0,000 | 1,7983  | 2,3513  |
|           | follower of tradition local religion | -1,1528 <sup>*</sup> | 0,33576 | 0,011 | -2,1429 | -0,1627 |
| Islamic   | Agnostic                             | -1,4655 <sup>*</sup> | 0,11395 | 0,000 | -1,8015 | -1,1295 |
|           | Hindu                                | -,7492 <sup>*</sup>  | 0,21660 | 0,010 | -1,3879 | -0,1105 |

|                   |                                      |                                      |           |         |       |         |         |
|-------------------|--------------------------------------|--------------------------------------|-----------|---------|-------|---------|---------|
| Personal Distress | follower of tradition local religion | Buddhist                             | ,8143 *   | 0,24498 | 0,016 | 0,0919  | 1,5367  |
|                   |                                      | Judaist                              | -4,1506 * | 0,74858 | 0,000 | -6,3580 | -1,9433 |
|                   |                                      | Christian                            | -2,0748 * | 0,09377 | 0,000 | -2,3513 | -1,7983 |
|                   |                                      | follower of tradition local religion | -3,2276 * | 0,33028 | 0,000 | -4,2015 | -2,2537 |
|                   |                                      | Agnostic                             | 1,7621 *  | 0,34194 | 0,000 | 0,7538  | 2,7704  |
|                   |                                      | Hindu                                | 2,4784 *  | 0,38840 | 0,000 | 1,3331  | 3,6237  |
|                   |                                      | Buddhist                             | 4,0419 *  | 0,40492 | 0,000 | 2,8479  | 5,2359  |
|                   | Agnostic                             | Judaist                              | -0,9230   | 0,81505 | 0,918 | -3,3264 | 1,4803  |
|                   |                                      | Christian                            | 1,1528 *  | 0,33576 | 0,011 | 0,1627  | 2,1429  |
|                   |                                      | Islamic                              | 3,2276 *  | 0,33028 | 0,000 | 2,2537  | 4,2015  |
|                   |                                      | Hindu                                | 0,0059    | 0,23029 | 1,000 | -0,6732 | 0,6849  |
|                   |                                      | Buddhist                             | 0,6365    | 0,25635 | 0,165 | -0,1194 | 1,3924  |
|                   |                                      | Judaist                              | 1,8499    | 0,74184 | 0,161 | -0,3375 | 4,0374  |
|                   | Hindu                                | Christian                            | ,5612 *   | 0,12691 | 0,000 | 0,1869  | 0,9354  |
|                   |                                      | Islamic                              | -1,2006 * | 0,11214 | 0,000 | -1,5313 | -0,8700 |
|                   |                                      | follower of tradition local religion | -2,1446 * | 0,33652 | 0,000 | -3,1369 | -1,1523 |
|                   |                                      | Agnostic                             | -0,0059   | 0,23029 | 1,000 | -0,6849 | 0,6732  |
|                   |                                      | Buddhist                             | 0,6306    | 0,31398 | 0,409 | -0,2952 | 1,5565  |
|                   |                                      | Judaist                              | 1,8441    | 0,76367 | 0,192 | -0,4078 | 4,0959  |
|                   | Buddhist                             | Christian                            | 0,5553    | 0,22130 | 0,156 | -0,0972 | 1,2079  |
|                   |                                      | Islamic                              | -1,2065 * | 0,21317 | 0,000 | -1,8351 | -0,5779 |
|                   |                                      | follower of tradition local religion | -2,1505 * | 0,38224 | 0,000 | -3,2776 | -1,0234 |
|                   |                                      | Agnostic                             | -0,6365   | 0,25635 | 0,165 | -1,3924 | 0,1194  |
|                   |                                      | Hindu                                | -0,6306   | 0,31398 | 0,409 | -1,5565 | 0,2952  |
|                   |                                      | Judaist                              | 1,2135    | 0,77193 | 0,700 | -1,0628 | 3,4897  |
|                   |                                      | Christian                            | -0,0753   | 0,24831 | 1,000 | -0,8075 | 0,6569  |
|                   |                                      | Islamic                              | -1,8371 * | 0,24109 | 0,000 | -2,5481 | -1,1262 |

|                                      |                                      |           |         |       |         |         |
|--------------------------------------|--------------------------------------|-----------|---------|-------|---------|---------|
|                                      | follower of tradition local religion | -2,7811 * | 0,39849 | 0,000 | -3,9562 | -1,6061 |
| Judaist                              | Agnostic                             | -1,8499   | 0,74184 | 0,161 | -4,0374 | 0,3375  |
|                                      | Hindu                                | -1,8441   | 0,76367 | 0,192 | -4,0959 | 0,4078  |
|                                      | Buddhist                             | -1,2135   | 0,77193 | 0,700 | -3,4897 | 1,0628  |
|                                      | Christian                            | -1,2888   | 0,73910 | 0,586 | -3,4682 | 0,8906  |
|                                      | Islamic                              | -3,0506 * | 0,73670 | 0,001 | -5,2229 | -0,8782 |
|                                      | follower of tradition local religion | -3,9946 * | 0,80212 | 0,000 | -6,3598 | -1,6293 |
| Christian                            | Agnostic                             | -,5612 *  | 0,12691 | 0,000 | -0,9354 | -0,1869 |
|                                      | Hindu                                | -0,5553   | 0,22130 | 0,156 | -1,2079 | 0,0972  |
|                                      | Buddhist                             | 0,0753    | 0,24831 | 1,000 | -0,6569 | 0,8075  |
|                                      | Judaist                              | 1,2888    | 0,73910 | 0,586 | -0,8906 | 3,4682  |
|                                      | Islamic                              | -1,7618 * | 0,09228 | 0,000 | -2,0339 | -1,4897 |
|                                      | follower of tradition local religion | -2,7058 * | 0,33043 | 0,000 | -3,6802 | -1,7315 |
| Islamic                              | Agnostic                             | 1,2006 *  | 0,11214 | 0,000 | 0,8700  | 1,5313  |
|                                      | Hindu                                | 1,2065 *  | 0,21317 | 0,000 | 0,5779  | 1,8351  |
|                                      | Buddhist                             | 1,8371 *  | 0,24109 | 0,000 | 1,1262  | 2,5481  |
|                                      | Judaist                              | 3,0506 *  | 0,73670 | 0,001 | 0,8782  | 5,2229  |
|                                      | Christian                            | 1,7618 *  | 0,09228 | 0,000 | 1,4897  | 2,0339  |
|                                      | follower of tradition local religion | -0,9440   | 0,32504 | 0,057 | -1,9025 | 0,0145  |
| follower of tradition local religion | Agnostic                             | 2,1446 *  | 0,33652 | 0,000 | 1,1523  | 3,1369  |
|                                      | Hindu                                | 2,1505 *  | 0,38224 | 0,000 | 1,0234  | 3,2776  |
|                                      | Buddhist                             | 2,7811 *  | 0,39849 | 0,000 | 1,6061  | 3,9562  |
|                                      | Judaist                              | 3,9946 *  | 0,80212 | 0,000 | 1,6293  | 6,3598  |
|                                      | Christian                            | 2,7058 *  | 0,33043 | 0,000 | 1,7315  | 3,6802  |
|                                      | Islamic                              | 0,9440    | 0,32504 | 0,057 | -0,0145 | 1,9025  |

Based on observed means.

The error term is Mean Square(Error) = 20,529.

\*. The mean difference is significant at the ,05 level.
